# Supplementary material for: Expression dynamics of metabolites in diploid and triploid watermelon in response to flooding
Source: PeerJ journal article supplement (doi:10.7717/peerj.13814), 2022-08-10
Supplement: All_Metabolites_RAW_data(1).xlsx [file All_Metabolites_RAW_data%281%29.xlsx]

## Sheet: Sheet1
Index	Q1 (Da)	Q3 (Da)	Molecular Weight (Da)	Formula	Ionization model	Compounds	Class I	Class II	CAS	Level	Z2X_0	Z3X_0	Z2x-3	Z3x-3	Z2x-5	Z3x-5	Z2x-7	Z3x-7	mix01	mix02	mix03	cpd_ID	kegg_map
pme3200	74	57	73.064	C2H7N3	[M+H]+	1-methylguanidine	Nucleotides and derivatives	Nucleotides and derivatives	471-29-4	A	68025	68171	55341	75313	49043	58000	45313	37590	61832	59914	64223	C02294	--
pme1974	87.01	43	88.016	C3H4O3	[M-H]-	Pyruvic acid	Organic acids	Organic acids	127-17-3	B	5211.3	8583.8	11799	11255	16495	10208	14360	9774.4	14196	15967	7179	C00022	ko00010,ko00020,ko00030,ko00040,ko00053,ko00250,ko00260,ko00261,ko00270,ko00290,ko00330,ko00350,ko00360,ko00430,ko00440,ko00620,ko00630,ko00650,ko00660,ko00710,ko00730,ko00760,ko00770,ko00900,ko01100,ko01110,ko01200,ko01210,ko01230,ko01502
pmf0096	88.99	70.9	89.995	C2H2O4	[M-H]-	Oxalic acid	Phenolic acids	Phenolic acids	144-62-7	B	20385	40580	519290	126990	394590	240600	466550	318610	280350	265320	263640	C00209	ko00230,ko00630,ko01100
pme2601	89	59	90.032	C3H6O3	[M-H]-	3-Hydroxypropanoic acid	Organic acids	Organic acids	503-66-2	B	62615	50737	99237	80132	207360	201300	170070	210140	125330	114120	139520	C01013	ko00240,ko00410,ko00640,ko01100,ko01200
Lmqp000873	101.02	55.02	100.018	C4H4O3	[M+H]+	Succinic anhydride	Organic acids	Organic acids	108-30-5	B	849220	709870	1086200	1487000	1597800	1722400	1453800	1762400	1485500	1474200	1404900	C19524	--
mws4052	102.05	56.05	101.048	C4H7NO2	[M+H]+	1-Aminocyclopropane-1-carboxylic acid	Organic acids	Organic acids	22059-21-8	B	808330	430730	925240	659210	864110	746430	299930	876380	596180	686660	662980	C01234	ko00270,ko01100,ko01110
pmf0256	101.1	84.7	102.104	C6H14O	[M-H]-	3-Methyl-1-pentanol	Others	Saccharides and Alcohols	589-35-5	B	228290	258640	50904	54382	59146	53150	68061	70017	175530	185590	184940	--	--
pme3017	104.07	58	103.063	C4H9NO2	[M+H]+	2-Aminoisobutyric acid	Amino acids and derivatives	Amino acids and derivatives	62-57-7	B	7107500	9190600	7700200	10517000	7080100	10803000	9422100	8999900	9824700	9538500	9754100	C03665	--
pme3011	104.07	68.8	103.063	C4H9NO2	[M+H]+	γ-Aminobutyric acid	Organic acids	Organic acids	56-12-2	B	5280800	5515600	23951000	21505000	22221000	21123000	25575000	28952000	20505000	19192000	20079000	C00334	ko00250,ko00330,ko00410,ko00650,ko00760,ko01100
pme3033	104.07	86	103.063	C4H9NO2	[M+H]+	N,N-Dimethylglycine	Amino acids and derivatives	Amino acids and derivatives	1118-68-9	B	3721000	3920600	14820000	13119000	12918000	13412000	16075000	17721000	12352000	12545000	12662000	C01026	ko00260,ko01100
mws0576	103.04	59.1	104.047	C4H8O3	[M-H]-	3-Hydroxybutyric acid	Organic acids	Organic acids	300-85-6	B	546880	1584800	849650	516360	833640	1172000	1512900	1049600	999370	1108400	1149600	C01089	ko00072,ko00650,ko01100
pme1975	103	59	104.06	C3H4O4	[M-H]-	Malonic acid	Organic acids	Organic acids	141-82-2	B	966810	1220000	1397000	1353100	2279500	1739400	1748200	1749000	1552200	1599000	1574600	C00383	ko00061,ko00240,ko00410,ko01100,ko01212
pme0010	106	60	105.043	C3H7NO3	[M+H]+	L-Serine	Amino acids and derivatives	Amino acids and derivatives	56-45-1	B	1130300	766740	1219700	938130	1012700	1021600	723750	1239200	916160	813090	950240	C00065	ko00260,ko00261,ko00270,ko00460,ko00600,ko00630,ko00920,ko00970,ko01100,ko01110,ko01200,ko01230,ko01502,ko02010
HJAP104	107.05	77.04	106.041	C7H6O	[M+H]+	Benzaldehyde	Phenolic acids	Phenolic acids	100-52-7	A	4394900	3702900	5746700	4009000	2268900	4128500	2731600	3640900	4016300	3663100	4002100	C00261	ko01100
mws0255	112.05	95	111.043	C4H5N3O	[M+H]+	Cytosine	Nucleotides and derivatives	Nucleotides and derivatives	71-30-7	A	529800	421950	506420	532180	434140	515710	357000	482480	525620	497610	493520	C00380	ko00240,ko01100
pme2122	112.09	95	111.08	C5H9N3	[M+H]+	Histamine	Amino acids and derivatives	Amino acids and derivatives	51-45-6	B	388570	309380	358880	404430	303380	345710	258670	346210	361520	339980	352440	C00388	ko00340,ko01100,ko01110
mws0177	111.01	67	112.016	C5H4O3	[M-H]-	2-Furoic acid	Organic acids	Organic acids	88-14-2	B	177110	135170	186560	335040	150410	202340	122580	243430	196640	200570	185450	C01546	ko01100
pme0257	111.02	80	112.027	C4H4N2O2	[M-H]-	Uracil	Nucleotides and derivatives	Nucleotides and derivatives	66-22-8	A	547540	444180	491720	518290	397050	353940	417520	434620	461720	474480	461030	C00106	ko00240,ko00410,ko00770,ko01100
pme0006	116.07	70.1	115.063	C5H9NO2	[M+H]+	L-Proline	Amino acids and derivatives	Amino acids and derivatives	147-85-3	A	597910	427430	1343200	1143700	1738800	1926000	1847900	2424400	1644800	1614800	1713200	C00148	ko00330,ko00332,ko00970,ko01100,ko01110,ko01230,ko02010
mws0376	115	71	116.011	C4H4O4	[M-H]-	Fumaric acid	Organic acids	Organic acids	110-17-8	B	1804900	2347500	688500	1853200	1293400	972500	1914300	1365100	1375800	1448000	1539100	C00122	ko00020,ko00190,ko00220,ko00250,ko00350,ko00360,ko00620,ko00650,ko00760,ko01100,ko01110,ko01200
pme0275	115.05	97	116.047	C5H8O3	[M]-	4-Oxopentanoic Acid	Organic acids	Organic acids	123-76-2	B	23150	28582	27832	29457	40045	33506	37243	32893	29669	34933	38257	--	--
mws0823	115.04	71	116.047	C5H8O3	[M-H]-	3-Methyl-2-Oxobutanoic acid	Organic acids	Organic acids	759-05-7	B	101510	124720	123790	108650	165080	155980	196800	189990	152850	144420	162200	C00141	ko00280,ko00290,ko00770,ko00966,ko01100,ko01110,ko01210,ko01230
pme3193	116.04	74	117.043	C4H7NO3	[M-H]-	N-Acetyl-L-glycine	Amino acids and derivatives	Amino acids and derivatives	543-24-8	B	65807	52589	74504	39488	59052	52393	46767	43526	52795	53945	53183	--	--
pme0066	116.1	74	117.054	C3H7N3O2	[M-H]-	Guanidinoacetate	Amino acids and derivatives	Amino acids and derivatives	352-97-6	B	46456	45699	66165	52235	41367	37422	43093	56026	51112	47472	54385	C00581	ko00260,ko00330,ko01100
pmb1096	118.07	91	117.058	C8H7N	[M+H]+	Indole	Alkaloids	Plumerane	120-72-9	B	11654	7551.9	59464	59044	80359	114300	38185	112460	67041	52454	68808	C00463	ko00380,ko00400,ko00402,ko01100,ko01110
mws0256	118.09	72.1	117.079	C5H11NO2	[M+H]+	L-Valine	Amino acids and derivatives	Amino acids and derivatives	72-18-4	A	4223100	3470000	6185400	6920900	5675800	6800700	3977500	7605300	4913300	5138100	5435600	C00183	ko00280,ko00290,ko00311,ko00460,ko00770,ko00966,ko00970,ko01100,ko01110,ko01210,ko01230,ko02010
pme0120	118.09	101	117.079	C5H11NO2	[M+H]+	5-Aminovaleric acid	Amino acids and derivatives	Amino acids and derivatives	660-88-8	B	50040	54706	127260	148870	170140	254580	350900	275600	153170	175010	196510	C00431	ko00310,ko00330,ko01100
pme2923	117	75	118.027	C4H6O4	[M-H]-	Acetoxyacetic acid	Organic acids	Organic acids	13831-30-6	B	3208700	3715400	2771900	2557900	4993700	3203300	2621800	3106600	3222200	3173500	3085600	--	--
mws0192	117.02	73	118.027	C4H6O4	[M-H]-	Succinic acid	Organic acids	Organic acids	110-15-6	A	4083300	3214000	5860500	9770200	8876400	9568500	8853300	9880500	8225500	8352500	7986300	C00042	ko00020,ko00190,ko00250,ko00310,ko00350,ko00360,ko00620,ko00630,ko00640,ko00650,ko00760,ko00920,ko01100,ko01110,ko01200
mws0470	117.02	73	118.027	C4H6O4	[M-H]-	Methylmalonic acid	Organic acids	Organic acids	516-05-2	B	3805700	3027200	5297500	8390000	8251400	8582100	8296200	9493100	7679400	7935800	7713400	C02170	ko00240,ko00280,ko00640,ko01100
mws0147	117.06	59	118.063	C5H10O3	[M-H]-	β-Hydroxyisovaleric acid	Organic acids	Organic acids	625-08-1	B	300150	406330	246660	281450	328810	357360	236960	439300	266960	294670	314660	C20827	ko00280,ko01100
pme3096	118	74	119.022	C3H5NO4	[M-H]-	Aminomalonic acid	Organic acids	Organic acids	1068-84-4	B	2789800	2576700	3900400	6301200	6162600	6787200	6421200	6849500	5394800	5786700	5436900	C00872	--
mws0230	120.07	74	119.058	C4H9NO3	[M+H]+	L-Threonine	Amino acids and derivatives	Amino acids and derivatives	72-19-5	A	822900	365310	962870	495930	1062900	733150	569000	1129200	582270	684320	682970	C00188	ko00260,ko00261,ko00290,ko00860,ko00970,ko01100,ko01110,ko01230,ko02010
mws0671	120.07	74.1	119.058	C4H9NO3	[M+H]+	L-Homoserine	Organic acids	Organic acids	672-15-1	B	831530	386440	950120	600370	940850	846300	670690	1131400	664160	711330	636620	C00263	ko00260,ko00270,ko00300,ko00920,ko01100,ko01110,ko01230
pmp001287	120.08	103.05	119.073	C8H9N	[M+H]+	N-Benzylmethylene isomethylamine	Alkaloids	Alkaloids	-	A	3892200	3169600	10701000	12028000	11161000	14504000	7838300	13390000	9268100	9341300	9684600	--	--
pma0134	121.04	93.06	120.042	C4H8O4	[M+H]+	D-(-)-Threose	Others	Saccharides and Alcohols	95-43-2	B	7480.9	9	86223	44044	168210	113720	301920	196370	115120	107430	133880	C06463	--
pme0195	120.02	62	121.02	C3H7NO2S	[M-H]-	L-Cysteine	Amino acids and derivatives	Amino acids and derivatives	52-90-4	B	1516700	1989500	895370	2416200	2493000	2131800	648020	1595400	1063500	1120400	1136700	C00097	ko00260,ko00270,ko00311,ko00332,ko00430,ko00460,ko00480,ko00730,ko00770,ko00920,ko00970,ko01100,ko01110,ko01200,ko01230,ko04122
pmb0069	122	105	121.053	C7H7NO	[M+H]+	Benzamide	Phenolic acids	Phenolic acids	55-21-0	B	70277	71414	128110	203080	146300	153660	194160	191450	128940	133260	140700	C09815	--
mws0491	122.1	105	121.089	C8H11N	[M+H]+	Phenethylamine	Alkaloids	Alkaloids	64-04-0	B	168080	247320	353070	607910	397120	434750	626440	582640	379310	391720	398170	C05332	ko00360,ko01100
pme0241	123.04	79	122.037	C7H6O2	[M+H]+	Benzoic acid	Phenolic acids	Phenolic acids	65-85-0	B	57200	37160	65883	40213	56390	50209	79787	76979	70495	99107	124800	C00180	ko00360,ko01100,ko01110
mws0628	121.03	92	122.037	C7H6O2	[M-H]-	4-Hydroxybenzaldehyde	Phenolic acids	Phenolic acids	123-08-0	A	14653000	9292500	9754900	14920000	8044400	8000600	9066800	11779000	11059000	12222000	11398000	C00633	ko01100
mws0133	123.06	80.05	122.048	C6H6N2O	[M+H]+	Nicotinamide	Others	Vitamin	98-92-0	B	7116300	5687200	24596000	12359000	60446000	52089000	57588000	46642000	42058000	37112000	38769000	C00153	ko00760,ko01100
pme2134	121	59	122.058	C4H10O4	[M-H]-	D-Threitol	Others	Saccharides and Alcohols	2418-52-2	B	1262300	1239200	1269200	1065100	1138700	1148300	1050200	1226700	1145500	1185500	1140100	C16884	--
pme1216	122.03	78	123.032	C6H5NO2	[M-H]-	2-Picolinic acid	Organic acids	Organic acids	98-98-6	B	612700	620410	1721700	833100	2131200	1381700	1777200	2431700	1400400	1521300	1366400	C10164	ko00380,ko01100
pme0490	124.04	78	123.032	C6H5NO2	[M+H]+	Nicotinic acid (Vitamin B3)	Others	Vitamin	59-67-6	B	1342100	1067200	3985800	1485700	4773300	2216400	3614900	4069900	2672500	2773700	2867100	C00253	ko00760,ko00960,ko01100,ko01110
Lmbp000668	124.04	78.03	123.032	C6H5NO2	[M+H]+	Isonicotinic acid	Organic acids	Organic acids	55-22-1	A	1383300	1143800	4200500	1527100	4755600	2281600	3598700	3978300	2784700	2752000	2848900	C07446	--
mws0236	124.01	80	125.015	C2H7NO3S	[M-H]-	2-Aminoethanesulfonic acid	Organic acids	Organic acids	107-35-7	B	6234.5	4731.6	6610.5	9	5788.1	6988.4	12770	8942.9	7120.4	5458.2	3774.4	C00245	ko00430,ko00920,ko01100,ko02010
mws0025	125.02	79.02	126.032	C6H6O3	[M-H]-	Pyrogallol	Phenolic acids	Phenolic acids	87-66-1	B	20725	14262	16096	26911	16174	26080	14447	19718	17546	18896	21668	C01108	--
pmp001086	127.04	97	126.032	C6H6O3	[M+H]+	5-Hydroxymethylfurfural	Phenolic acids	Phenolic acids	67-47-0	B	103670	100970	60336	25846	27963	9	150260	18925	55315	63863	82284	C11101	--
mws0251	127.05	110	126.043	C5H6N2O2	[M+H]+	Thymine	Nucleotides and derivatives	Nucleotides and derivatives	65-71-4	A	95841	68386	89177	104670	73724	82786	54288	111340	108370	87970	89584	C00178	ko00240,ko01100
mws0263	128.04	82.03	129.043	C5H7NO3	[M-H]-	5-Oxo-L-Proline	Amino acids and derivatives	Amino acids and derivatives	98-79-3	B	58436	56509	92350	98189	67704	96416	128910	181840	74973	85615	104680	C01879	ko00480,ko01100
pmb0785	130.07	103.3	129.058	C9H7N	[M+H]+	Isoquinoline	Alkaloids	Isoquinoline alkaloids	119-65-3	B	4611.7	4383.4	19408	6089.9	17681	31083	5338.2	19164	13580	13156	12110	C06323	--
ML10181668	130.09	84.08	129.079	C6H11NO2	[M+H]+	Cycloleucine	Amino acids and derivatives	Amino acids and derivatives	52-52-8	B	4440600	3224100	9368900	8842400	9934500	10261000	12957000	16144000	7618800	8209600	9352500	C03969	--
Rfmb319	130.09	84.08	129.079	C6H11NO2	[M+H]+	Pipecolic acid	Amino acids and derivatives	Amino acids and derivatives	4043-87-2	B	1253800	1150700	1888100	1924600	2295000	2474500	2453400	3597100	1798000	1856600	2088100	C00408	ko00310,ko00960,ko01100,ko01110
mws0425	129.02	85	130.027	C5H6O4	[M-H]-	Citraconic acid	Organic acids	Organic acids	498-23-7	B	1670500	1660900	1673900	2077000	1488900	1536100	874170	1334400	1439300	1506500	1527600	C02226	ko00290,ko00660,ko01100,ko01210
Zmgn000217	129.02	85.03	130.027	C5H6O4	[M-H]-	Methylenesuccinic acid	Organic acids	Organic acids	97-65-4	A	38407	26705	41809	99018	66001	74519	29353	67522	43867	55725	30073	C00490	ko00660,ko01100
mws0712	130.05	86	131.058	C5H9NO3	[M-H]-	N-Propionylglycine	Amino acids and derivatives	Amino acids and derivatives	21709-90-0	B	36369	38490	23431	78503	41175	69853	26899	56669	66358	47777	43024	--	--
pmf0470	132.07	73	131.058	C5H9NO3	[M+H]+	cis-4-Hydroxy-D-proline	Amino acids and derivatives	Amino acids and derivatives	2584-71-6	B	44034	108120	46967	84462	30295	150990	96742	112440	97047	111970	124240	C03440	ko00330,ko01100
ML10197929	130.09	88.04	131.069	C4H9N3O2	[M-H]-	Creatine	Others	Others	57-00-1	B	351270	370240	296930	364900	265790	457280	252810	270560	338940	356990	356550	C00300	ko00260,ko00330,ko01100
Zmpn000638	130.05	88.04	131.069	C4H9N3O2	[M-H]-	3-Guanidinopropionic acid	Organic acids	Organic acids	353-09-3	B	214300	144740	362500	183280	321180	287690	350860	354960	291680	315100	264450	C03065	--
mws1587	132.1	86	131.095	C6H13NO2	[M+H]+	L-Norleucine	Amino acids and derivatives	Amino acids and derivatives	327-57-1	A	1679700	1319100	2822200	3164600	2723000	3175300	1586200	3237500	2141800	2282600	2268500	C01933	--
pmp001198	132.1	57.1	131.095	C6H13NO2	[M+H]+	6-Deoxyfagomine	Alkaloids	Alkaloids	197449-09-5	A	4799000	4060800	8514700	9562000	9295700	10351000	4379100	9797300	6401700	6784400	6852700	--	--
mws0258	132.1	86	131.095	C6H13NO2	[M+H]+	L-Isoleucine	Amino acids and derivatives	Amino acids and derivatives	73-32-5	A	1730000	1311000	2948200	3213100	2729800	3250900	1658800	3250500	2211300	2279300	2317100	C00407	ko00280,ko00290,ko00460,ko00960,ko00966,ko00970,ko01100,ko01110,ko01210,ko01230,ko02010
pme0274	132.1	69	131.095	C6H13NO2	[M+H]+	6-Aminocaproic acid	Organic acids	Organic acids	60-32-2	B	5818300	2498500	5851600	10892000	3924700	15220000	4838600	14114000	9514300	5962500	7607500	C02378	ko01100
mws0227	132.1	86.2	131.095	C6H13NO2	[M+H]+	L-Leucine	Amino acids and derivatives	Amino acids and derivatives	61-90-5	A	1703600	1420900	2869400	3270000	2699200	3243800	1562000	3260800	2237300	2312900	2260200	C00123	ko00280,ko00290,ko00966,ko00970,ko01100,ko01110,ko01210,ko01230,ko02010
mws0473	131.03	87.05	132.042	C5H8O4	[M-H]-	2-Methylsuccinic acid	Organic acids	Organic acids	498-21-5	B	852170	1842500	726910	654510	1237600	1301200	1236500	1225100	952590	998850	1030400	--	--
pme0243	131.03	87.05	132.042	C5H8O4	[M-H]-	Glutaric acid	Organic acids	Organic acids	110-94-1	B	854370	1947400	648700	657850	1223300	1367000	1270200	1325500	1006900	1069200	1033200	C00489	ko00071,ko00310,ko01100
pme3034	131.03	69.03	132.042	C5H8O4	[M-H]-	Ethylmalonic acid	Organic acids	Organic acids	601-75-2	B	34442	69932	29246	25543	51035	57688	50492	54993	35668	45836	44791	--	--
Lmmn000806	131.03	87.05	132.042	C5H8O4	[M-H]-	Dimethylmalonic acid	Organic acids	Organic acids	595-46-0	B	69547	150720	55096	56879	102750	98584	101480	99770	72770	86502	93978	--	--
Lmgn000160	131.05	70.03	132.053	C4H8N2O3	[M-H]-	3-Ureidopropionic Acid	Organic acids	Organic acids	462-88-4	B	29461	16820	37735	24585	38248	43286	22326	66896	32992	28216	27801	C02642	ko00240,ko00410,ko00770,ko01100
mws0001	133.06	74	132.054	C4H8N2O3	[M+H]+	L-Asparagine	Amino acids and derivatives	Amino acids and derivatives	70-47-3	B	216100	95119	222660	89394	174730	117240	115890	244190	143880	124960	126720	C00152	ko00250,ko00460,ko00970,ko01100,ko01110,ko01230
mws0972	131.07	85	132.079	C6H12O3	[M-H]-	6-Hydroxyhexanoic acid	Organic acids	Organic acids	1191-25-9	B	532370	782320	703630	560120	1077200	816680	616210	621470	742580	724180	686610	C06103	--
Lmrn002746	131.07	85.07	132.079	C6H12O3	[M-H]-	2-Hydroxy-4-methylpentanoic acid	Organic acids	Organic acids	498-36-2	B	70581	30400	297490	104850	67505	92282	80407	78129	128590	85341	103690	--	--
mws0341	131.07	85	132.079	C6H12O3	[M-H]-	2-Hydroxyisocaproic acid	Organic acids	Organic acids	20312-37-2	B	612090	327380	2747300	929650	710420	953610	787100	940310	1025400	1084600	1006900	C03264	--
pme2527	133	116	132.09	C5H12N2O2	[M+H]+	L-Ornithine	Amino acids and derivatives	Amino acids and derivatives	70-26-8	B	68561	33415	169420	170880	343360	381640	204160	683470	213440	219260	227110	C00077	ko00220,ko00330,ko00472,ko00480,ko01100,ko01110,ko01210,ko01230,ko02010
mws0219	132.03	88	133.038	C4H7NO4	[M-H]-	L-Aspartic Acid	Amino acids and derivatives	Amino acids and derivatives	56-84-8	A	6228800	2845000	3157300	2374800	2600100	2039100	2507500	2269000	2791900	3218400	2949900	C00049	ko00220,ko00250,ko00260,ko00261,ko00270,ko00300,ko00340,ko00410,ko00460,ko00710,ko00760,ko00770,ko00970,ko01100,ko01110,ko01200,ko01210,ko01230,ko02010
Lmbn000198	133.01	71.01	134.022	C4H6O5	[M-H]-	3-Dehydro-L-Threonic Acid	Organic acids	Organic acids	-	A	40447000	51351000	19000000	31605000	20275000	22756000	40052000	17910000	30076000	29702000	28076000	C03064	ko00053,ko01100
mws0275	133.01	71.01	134.022	C4H6O5	[M-H]-	L-Malic acid	Organic acids	Organic acids	97-67-6	A	1640000	2465900	688960	1203800	690680	713240	1304900	538480	1050800	1264500	1176500	C00149	ko00020,ko00620,ko00630,ko00710,ko01100,ko01110,ko01200
Lmxp000939	136.06	119.04	135.054	C5H5N5	[M+H]+	Zarzissine	Alkaloids	Alkaloids	160568-14-9	A	3540400	4428300	3950100	7107600	5230700	6223800	3911200	7037100	6277400	6483200	6054700	--	--
pme0040	136.06	119	135.054	C5H5N5	[M+H]+	Adenine	Nucleotides and derivatives	Nucleotides and derivatives	73-24-5	A	3370100	4563000	4232700	6807000	4896900	5928000	3836200	7183600	6127800	5944600	6038000	C00147	ko00230,ko00908,ko01100
HJKP000649	136.07	91.05	135.068	C8H9NO	[M+H]+	N-benzylformamide	Alkaloids	Alkaloids	6343-54-0	B	472440	344580	704120	806210	724680	720090	468990	827140	596420	653230	625970	C15561	--
mws0889	135.03	75.01	136.037	C4H8O5	[M-H]-	D-Threonic Acid	Others	Saccharides and Alcohols	3909-12-4	B	380800	375470	292950	370030	325530	375590	289890	328610	298930	308800	339200	C21649	--
pme1173	137.05	110	136.039	C5H4N4O	[M+H]+	Allopurinol	Nucleotides and derivatives	Nucleotides and derivatives	315-30-0	B	45024	62342	131250	67383	77869	65448	134350	95073	93218	94693	95934	--	--
pme0033	137.05	119	136.039	C5H4N4O	[M+H]+	Hypoxanthine	Nucleotides and derivatives	Nucleotides and derivatives	68-94-0	B	53646	78733	129370	90089	77158	81068	135770	107480	101710	89001	114040	C00262	ko00230,ko01100
Hmbn002174	135.05	120.02	136.053	C8H8O2	[M-H]-	4-Hydroxyacetophenone	Phenolic acids	Phenolic acids	99-93-4	A	52189	40700	654480	254040	104290	82706	96003	66615	169760	176320	186310	C10700	ko01100
mws0146	138.05	78	137.048	C7H7NO2	[M+H]+	Nicotinic Acid Methyl Ester(Methyl Nicotinate)	Alkaloids	Alkaloids	93-60-7	B	127350	139090	106930	156870	89815	149770	92169	149550	119440	146360	139740	--	--
mws1336	138.06	120	137.048	C7H7NO2	[M+H]+	4-Aminobenzoic acid	Phenolic acids	Phenolic acids	150-13-0	B	30659	20433	42198	22373	34986	22985	24855	26722	31505	26569	37090	C00568	ko00790,ko01100
mws1078	138.05	92.1	137.048	C7H7NO2	[M+H]+	Anthranilic Acid	Phenolic acids	Phenolic acids	118-92-3	B	138510	121890	135240	123350	129800	120160	134010	129570	125150	141210	128180	C00108	ko00380,ko00400,ko00998,ko01058,ko01100,ko01110,ko01230
pme2268	138.05	94.07	137.048	C7H7NO2	[M+H]+	Trigonelline	Alkaloids	Alkaloids	535-83-1	A	8705700	5964600	4331000	4221500	5483500	4738400	5935600	7108100	5123300	4931000	5447400	C01004	ko00760
pme1002	138.09	103	137.084	C8H11NO	[M+H]+	L-Tyramine	Amino acids and derivatives	Amino acids and derivatives	51-67-2	B	14610	9899.5	40195	28901	26138	24469	67306	37064	26914	31123	32872	C00483	ko00350,ko00950,ko01100,ko01110
mws0749	137.02	93	138.032	C7H6O3	[M-H]-	4-Hydroxybenzoic acid	Phenolic acids	Phenolic acids	99-96-7	B	8294800	10520000	18551000	19246000	24553000	31161000	17415000	40784000	20478000	21197000	21100000	C00156	ko00130,ko00790,ko01100,ko01110
Lmgn001670	137.03	108.02	138.032	C7H6O3	[M-H]-	Salicylic acid	Phenolic acids	Phenolic acids	69-72-7	A	458010	461950	659860	871180	452610	368810	1079200	644060	683790	752040	687630	C00805	ko00360,ko01100,ko01110,ko04075
Lmbn001981	137.02	93.03	138.032	C7H6O3	[M-H]-	2,5-Dihydroxybenzaldehyde	Phenolic acids	Phenolic acids	1194-98-5	A	6413400	7417000	12963000	13383000	17987000	23931000	12499000	27572000	14794000	15215000	15013000	C05585	ko00350,ko01100
Hmgn001653	137.02	93.04	138.032	C7H6O3	[M-H]-	Protocatechualdehyde	Phenolic acids	Phenolic acids	139-85-5	B	6605600	7900700	11882000	13137000	16807000	23425000	11679000	27858000	14405000	14608000	14932000	C16700	ko00950
mws2368	137.06	119.05	138.068	C8H10O2	[M-H]-	Tyrosol	Phenolic acids	Phenolic acids	501-94-0	B	60089	56183	86075	105990	60446	49123	130890	93393	102050	108930	101700	C06044	ko00350,ko01100
pme2828	140	99	139.027	C6H5NO3	[M+H]+	4-Nitrophenol	Phenolic acids	Phenolic acids	100-02-7	B	8217800	6501700	7945500	1977600	5897100	3617000	3579500	5586200	7528400	6916200	6742000	C00870	--
pme3207	141.02	59	142.027	C6H6O4	[M-H]-	Muconic acid	Organic acids	Organic acids	1119-72-8	B	6536200	4202100	16795000	6495900	18247000	13783000	22952000	16605000	12720000	13590000	14356000	C02480	ko01100
pmb0764	144.05	113.2	143.04	C6H9NOS	[M+H]+	4-Methyl-5-thiazoleethanol	Others	Others	137-00-8	B	119430	100850	98962	149130	63265	81183	66741	97098	108810	116720	110620	C04294	ko00730,ko01100
Rfmb320	144.1	84.08	143.095	C7H13NO2	[M+H]+	1-Methylpiperidine-2-carboxylic acid	Amino acids and derivatives	Amino acids and derivatives	7730-87-2	B	1236200	1271000	882080	1193800	855720	997840	878900	1005000	1039200	998130	1018100	--	--
pme0295	146.08	86	145.074	C6H11NO3	[M+H]+	4-Acetamidobutyric acid	Organic acids	Organic acids	3025-96-5	B	500740	468630	1177500	1167800	1441200	1180400	1590500	1893400	1141400	1137600	1114400	C02946	ko00330,ko01100
mws0567	146.09	87	145.085	C5H11N3O2	[M+H]+	4-Guanidinobutyric acid	Organic acids	Organic acids	463-00-3	A	1681200	34317000	948070	32608000	1155500	33589000	1105600	30874000	13309000	12922000	13670000	C01035	ko00330,ko01100
Lmgn000224	145.01	57.03	146.022	C5H6O5	[M-H]-	2-Methyl-3-oxosuccinic acid	Organic acids	Organic acids	-	B	132090	147700	255750	268660	200390	182010	305410	140150	225950	222840	257050	C06030	ko00660
pme2380	145.01	101	146.022	C5H6O5	[M-H]-	α-Ketoglutaric acid	Organic acids	Organic acids	328-50-7	B	1208800	1224800	1826600	1369600	1759300	1364700	2274800	988590	1707300	1719500	1596700	C00026	ko00020,ko00040,ko00053,ko00220,ko00250,ko00300,ko00310,ko00340,ko00430,ko00630,ko00650,ko00660,ko01100,ko01110,ko01200,ko01210,ko01230
mws0208	145.05	101	146.058	C6H10O4	[M-H]-	Adipic Acid	Organic acids	Organic acids	124-04-9	B	1998100	3070400	862950	877930	738900	915710	768120	603610	1102100	1042600	1111500	C06104	ko01100
Wmzn000227	145.06	109.04	146.058	C6H10O4	[M-H]-	2,2-Dimethylsuccinic acid	Organic acids	Organic acids	597-43-3	A	251180	104100	298930	173930	157590	199650	170070	261700	181640	163080	191820	--	--
pme0193	147.08	84	146.069	C5H10N2O3	[M+H]+	L-Glutamine	Amino acids and derivatives	Amino acids and derivatives	56-85-9	A	2209300	1228000	10766000	8162800	15705000	13107000	4666200	21276000	8640900	8497300	9044500	C00064	ko00220,ko00230,ko00240,ko00250,ko00630,ko00910,ko00970,ko01100,ko01230,ko02010
pme0026	147.11	84	146.106	C6H14N2O2	[M+H]+	L-Lysine	Amino acids and derivatives	Amino acids and derivatives	56-87-1	A	34143	18601	204690	129270	273180	235310	74355	366930	156140	146380	155140	C00047	ko00300,ko00310,ko00780,ko00960,ko00970,ko01100,ko01110,ko01210,ko01230,ko02010
pme0014	148.06	84	147.053	C5H9NO4	[M+H]+	L-Glutamic acid	Amino acids and derivatives	Amino acids and derivatives	56-86-0	B	11339000	7059200	10929000	4290800	9708800	6230900	7671100	6545100	6750600	6960300	7537400	C00025	ko00220,ko00250,ko00330,ko00332,ko00340,ko00430,ko00480,ko00630,ko00650,ko00660,ko00860,ko00910,ko00970,ko01100,ko01110,ko01200,ko01210,ko01230,ko02010
Zmzn000113	146.05	102.06	147.053	C5H9NO4	[M-H]-	L-threo-3-Methylaspartate	Amino acids and derivatives	Amino acids and derivatives	6061-13-8	A	831030	548840	1323200	863440	1061100	924640	763720	980950	848470	914880	901870	C03618	ko00630,ko00660,ko01100,ko01200
mws1050	148.06	88	147.053	C5H9NO4	[M+H]+	O-Acetylserine	Amino acids and derivatives	Amino acids and derivatives	5147-00-2	B	519680	706110	1219700	959220	427980	578340	1274100	660890	787200	865110	949420	C00979	ko00270,ko00908,ko00920,ko01100,ko01110,ko01200,ko01230,ko04122
pmp001285	149.02	65.04	148.016	C8H4O3	[M+H]+	Phthalic anhydride	Phenolic acids	Phenolic acids	85-44-9	A	2317500	3046900	2427400	1939600	3067700	2615000	3004700	2263100	2788000	2644000	2601100	--	--
Lmbn000216	147.03	57.03	148.037	C5H8O5	[M-H]-	(2R,3S)-3-methylmalic acid	Organic acids	Organic acids	152204-30-3	B	44908	119450	336830	467100	278260	334350	200920	190510	160410	182810	240450	C06032	ko00290,ko00660,ko01100,ko01210,ko01230
Zmyn000247	147.03	57.03	148.037	C5H8O5	[M-H]-	2-Hydroxyglutaric Acid	Organic acids	Organic acids	13095-48-2	A	80919	104160	276820	381740	196110	334690	184870	198210	171290	163220	222070	C03196	ko00310,ko01100
pmb2826	147.03	87.1	148.037	C5H8O5	[M-H]-	L-Citramalic acid	Organic acids	Organic acids	6236-09-5	A	204890	307680	9	310180	9	278400	187470	204150	201460	239340	139430	C02614	ko00660,ko01100
mws2213	147.05	77.01	148.052	C9H8O2	[M-H]-	Cinnamic acid	Phenolic acids	Phenolic acids	140-10-3	B	17625	27009	29371	58705	52810	58181	113230	38756	56788	58261	59044	C00423	ko00130,ko00360,ko00940,ko00998,ko01100,ko01110
mws1024	147.05	129	148.052	C9H8O2	[M-H]-	p-Coumaraldehyde	Phenolic acids	Phenolic acids	2538-87-6	B	201360	213050	264860	254610	509290	334000	492120	287340	326300	337360	339010	C05608	ko00940,ko01100,ko01110
Lmgp000796	150.06	61.01	149.048	C8H7NO2	[M+H]+	4-Hydroxymandelonitrile	Alkaloids	Alkaloids	13093-65-7	B	1398700	1911000	2059700	2425800	2199600	1990600	1960900	1883200	2249800	2253100	2260700	C00650	--
pme1210	150.06	61	149.051	C5H11NO2S	[M+H]+	L-Methionine	Amino acids and derivatives	Amino acids and derivatives	63-68-3	B	1409300	1945100	1900800	2356400	2060400	2021100	1994900	1777100	2101300	2177300	2255700	C00073	ko00270,ko00966,ko00970,ko01100,ko01110,ko01210,ko01230
mws0847	150.08	133	149.07	C6H7N5	[M+H]+	1-Methyladenine	Nucleotides and derivatives	Nucleotides and derivatives	5142-22-3	A	749200	419230	410030	562880	497570	754420	392290	479030	444090	683430	608080	C02216	--
mws1499	149.05	59.01	150.053	C5H10O5	[M-H]-	D-Arabinose	Others	Saccharides and Alcohols	10323-20-3	A	76682	121510	60593	90960	22561	69073	126530	32042	115630	117030	117930	C00216	--
Zmgn000173	149.05	75.01	150.053	C5H10O5	[M-H]-	D-Ribose	Others	Saccharides and Alcohols	50-69-1	A	141020	176590	197700	188400	137630	162880	132590	181260	146670	179450	154970	C00121	ko00030,ko01100,ko02010
pmf0420	149.06	74.9	150.068	C9H10O2	[M-H]-	Benzyl acetate	Organic acids	Organic acids	140-11-4	B	52098	58756	44018	54570	57065	41723	59442	41783	64245	74088	76454	C15513	--
mws0921	149.06	131	150.068	C9H10O2	[M-H]-	p-Coumaryl alcohol	Phenolic acids	Phenolic acids	3690-05-9	B	3433200	4859300	1618300	2572200	2877700	3230700	4363400	1671700	3187700	3031200	3103400	C02646	ko00940,ko01100,ko01110
mws0008	149.06	105	150.068	C9H10O2	[M-H]-	Hydrocinnamic acid	Phenolic acids	Phenolic acids	501-52-0	B	9	9	31189	13159	8399.2	23891	49025	26024	32539	30096	23916	C05629	ko00360,ko01100
Lmxn006423	150	122.01	151.009	C7H5NOS	[M-H]-	2(3H)-Benzothiazolone	Alkaloids	Alkaloids	934-34-9	A	345300	177820	126920	83606	172570	180680	298770	140210	159870	165750	174460	--	--
pme1109	152.06	135	151.049	C5H5N5O	[M+H]+	Guanine	Nucleotides and derivatives	Nucleotides and derivatives	73-40-5	A	1748900	665900	1092600	979100	915020	782370	750780	994620	1038700	1116500	1142700	C00242	ko00230,ko01100
pme0183	152.06	135	151.049	C5H5N5O	[M+H]+	Isoguanine	Nucleotides and derivatives	Nucleotides and derivatives	3373-53-3	A	294040	154950	219080	231440	167600	172930	144500	218420	247020	247240	223620	--	--
pme0256	151.03	151	152.033	C5H4N4O2	[M-H]-	Xanthine	Nucleotides and derivatives	Nucleotides and derivatives	69-89-6	A	49751	104610	1174400	443990	741580	1184800	652200	445830	456460	583130	844410	C00385	ko00230,ko00232,ko01100,ko01110
mws0182	151.04	106.9	152.047	C8H8O3	[M-H]-	p-Hydroxyphenyl acetic acid	Phenolic acids	Phenolic acids	156-38-7	B	17751	11727	22768	13377	25281	25802	27586	38040	26962	30334	26618	C00642	ko00350,ko00360,ko01100
pme2362	151.04	107	152.047	C8H8O3	[M-H]-	Mandelic acid	Phenolic acids	Phenolic acids	90-64-2	B	52411	46766	48799	34435	75746	54997	106210	62619	66702	73006	53978	C01984	--
mws0458	151.04	136	152.047	C8H8O3	[M-H]-	Vanillin	Phenolic acids	Phenolic acids	121-33-5	B	3572100	3043300	2773300	3098100	3911600	2983300	4153000	2675300	2984800	3007100	3052900	C00755	ko00998,ko01100,ko01110
mws0145	151.04	93	152.047	C8H8O3	[M-H]-	O-Anisic acid (2-Methoxybenzoic acid)	Phenolic acids	Phenolic acids	529-75-9	B	4440.2	6595.3	40815	8656.7	55390	39373	79895	129920	43586	51423	40618	--	--
mws0213	151.06	71	152.068	C5H12O5	[M-H]-	Ribitol	Others	Saccharides and Alcohols	488-81-3	B	47130	67178	21851	34351	20263	18306	59899	39907	58811	35631	32668	C00474	ko00040,ko00740,ko01100
pme0513	151.06	59	152.068	C5H12O5	[M-H]-	Xylitol	Others	Saccharides and Alcohols	87-99-0	B	50366	52196	27953	33640	44219	51583	49844	41948	47490	46752	45677	C00379	ko00040,ko01100,ko02010
mws0437	151.06	71	152.068	C5H12O5	[M-H]-	D-Arabitol	Others	Saccharides and Alcohols	488-82-4	B	38322	34945	28268	38201	39496	37563	37243	28806	41479	33130	38444	C01904	ko00040,ko01100
mws0596	154.05	136.04	153.043	C7H7NO3	[M+H]+	3-Hydroxyanthranilic acid	Organic acids	Organic acids	548-93-6	B	51520	43720	24835	62923	84257	58159	26426	39935	39383	48309	38282	C00632	ko00380,ko01100
mws0444	152.04	108	153.043	C7H7NO3	[M-H]-	3-Aminosalicylic acid	Phenolic acids	Phenolic acids	570-23-0	B	65843	14640	60437	26617	58501	49304	130380	44815	54091	57885	67645	--	--
mws0180	153.02	109.03	154.027	C7H6O4	[M-H]-	2,5-Dihydroxybenzoic acid; Gentisic Acid	Phenolic acids	Phenolic acids	490-79-9	B	157480	148870	284340	175400	239640	254710	510500	401910	285170	308870	257340	C00628	ko00350,ko01100
mws0183	153.02	109.03	154.027	C7H6O4	[M-H]-	3,4-Dihydroxybenzoic acid (Protocatechuic acid)*	Phenolic acids	Phenolic acids	99-50-3	B	303780	280920	545650	365580	501900	474470	910200	873820	534020	589360	617970	C00230	ko01100,ko01110
mws0885	153.02	109.03	154.027	C7H6O4	[M-H]-	2,4-Dihydroxybenzoic acid*	Phenolic acids	Phenolic acids	89-86-1	B	314670	288590	581010	345910	480580	439310	922260	849570	510210	568410	531780	--	--
mws0639	153.02	109.03	154.027	C7H6O4	[M-H]-	2,3-Dihydroxybenzoic Acid*	Organic acids	Organic acids	303-38-8	B	324040	352330	669430	410390	538210	504230	1104700	834350	683800	634330	725460	C00196	ko01110
pmb3099	153.03	125	154.039	C4H11O4P	[M-H]-	Diethyl phosphate	Organic acids	Organic acids	598-02-7	B	10410	9360.1	9981.1	9495.3	7762.1	10834	9322.9	9280.3	12053	12939	11543	C06608	--
mws0254	156.08	110	155.069	C6H9N3O2	[M+H]+	L-Histidine	Amino acids and derivatives	Amino acids and derivatives	71-00-1	A	4601000	6048000	2420500	3680900	1902200	3000200	4206800	3171900	4070100	3977200	4108200	C00135	ko00340,ko00410,ko00970,ko01100,ko01110,ko01230,ko02010
pmf0174	157.16	157.2	158.167	C10H22O	[M-H]-	1-Decanol	Others	Saccharides and Alcohols	112-30-1	B	14056000	15952000	12400000	16631000	11329000	12108000	11150000	16990000	13317000	13331000	13582000	C01633	--
pmf0175	157.16	157.2	158.167	C10H22O	[M-H]-	2-Decanol*	Others	Saccharides and Alcohols	1120-06-5	B	16405000	18706000	14266000	19161000	13125000	14137000	12930000	19525000	15370000	15464000	15663000	--	--
pme2589	159.1	87	160.037	C6H8O5	[M-H]-	2-Oxoadipic acid	Organic acids	Organic acids	3184-35-8	B	15061	9	28332	74143	75355	74590	40126	56848	46239	56408	47540	C00322	ko00300,ko00310,ko00380,ko01100,ko01110,ko01210,ko01230
Lmbn002072	159.07	97.07	160.074	C7H12O4	[M-H]-	2-Propylsuccinic acid	Organic acids	Organic acids	618-57-5	A	771980	1266000	297560	330050	257570	277640	182990	220050	375430	387420	378450	C16657	--
pme0128	159.08	88	160.085	C6H12N2O3	[M-H]-	L-Alanyl-L-Alanine	Amino acids and derivatives	Amino acids and derivatives	1948-31-8	B	8061.8	6278.6	22556	12381	14308	14610	17360	12910	12836	18748	17267	--	--
mws1550	162.06	73.1	161.051	C6H11NO2S	[M+H]+	S-Allyl-L-cysteine	Amino acids and derivatives	Amino acids and derivatives	21593-77-1	B	16041	15423	38766	31611	6458.1	17290	33278	6881.1	41262	46429	44080	C16759	--
pme3382	160.06	98	161.069	C6H11NO4	[M-H]-	N-Acetyl-L-threonine	Amino acids and derivatives	Amino acids and derivatives	17093-74-2	B	128100	126290	166410	121970	171900	208820	206220	149590	193130	174920	142730	--	--
pme2914	161.05	99	162.053	C6H10O5	[M-H]-	3-Hydroxy-3-methylpentane-1,5-dioic acid	Amino acids and derivatives	Amino acids and derivatives	503-49-1	A	16803000	7013200	32281000	32603000	34589000	42236000	19758000	34046000	31235000	31065000	30943000	C03761	--
pmf0440	163.08	91.1	162.068	C10H10O2	[M+H]+	4-MethoxycinnaMaldehyde	Phenolic acids	Phenolic acids	1963-36-6	B	291150	250440	232070	315300	249400	247190	223250	276360	292100	278660	265070	C10475	--
pme3027	162	84	163.03	C5H9NO3S	[M-H]-	N-Acetyl-L-Cysteine	Amino acids and derivatives	Amino acids and derivatives	616-91-1	B	9	9	83912	115850	84106	178970	18171	100940	48467	62163	52274	C06809	--
pme1419	164.07	104	163.067	C6H13NO2S	[M+H]+	L-Methionine methyl ester	Amino acids and derivatives	Amino acids and derivatives	10332-17-9	B	47350	68555	39927	71134	33264	56405	25887	29379	46389	45767	48654	--	--
mws0159	163.04	91	164.047	C9H8O3	[M-H]-	Phenylpyruvic acid	Organic acids	Organic acids	156-06-9	B	154930	148580	338150	218000	304370	241790	291890	217550	315450	325680	280580	C00166	ko00360,ko00400,ko00960,ko01100,ko01110,ko01210,ko01230
pme1439	165.05	119	164.047	C9H8O3	[M+H]+	p-Coumaric acid	Phenolic acids	Phenolic acids	501-98-4	B	169390	182200	145690	125970	173310	216920	219090	177920	207260	211350	209170	C00811	ko00130,ko00350,ko00940,ko00950,ko00998,ko01100,ko01110
pmb0142	165.1	95.2	164.047	C9H8O3	[M+H]+	Caffeic aldehyde	Phenolic acids	Phenolic acids	141632-15-7	B	51533	37763	46149	46880	67882	67442	61770	72377	56600	58016	51675	C10945	ko00940,ko01110
Lmmn001643	163.04	119.05	164.047	C9H8O3	[M-H]-	2-Hydroxycinnamic acid	Organic acids	Organic acids	583-17-5	A	2788300	2770700	2195300	2359400	2779100	3386600	3136700	2542400	3115300	3082700	3062300	C01772	ko00360,ko00940,ko01100,ko01110
pme3083	164.04	120	165.043	C8H7NO3	[M-H]-	2-(Formylamino)benzoic acid	Phenolic acids	Phenolic acids	3342-77-6	B	650630	665210	622200	616460	836510	806540	844190	727070	770620	690550	726700	C05653	ko00380,ko01100
pme2617	166.05	102	165.046	C5H11NO3S	[M+H]+	L-Methionine Sulfoxide	Amino acids and derivatives	Amino acids and derivatives	3226-65-1	B	11078000	12560000	9493800	11750000	9064100	10333000	8854600	10086000	10357000	10194000	10179000	C02989	ko00270
pme3968	166.07	149.05	165.065	C6H7N5O	[M+H]+	7-Methylguanine	Nucleotides and derivatives	Nucleotides and derivatives	578-76-7	A	101340	67304	311210	250610	345900	355710	170840	270590	251380	247660	243520	C02242	--
pme0021	166.09	120.08	165.07	C9H11NO2	[M+H]+	L-Phenylalanine	Amino acids and derivatives	Amino acids and derivatives	63-91-2	A	9811700	7932400	26592000	29523000	28266000	36593000	19423000	33548000	24354000	23380000	24705000	C00079	ko00360,ko00400,ko00460,ko00940,ko00960,ko00966,ko00970,ko00998,ko01100,ko01110,ko01210,ko01230,ko02010
pme0282	165.02	77.04	166.027	C8H6O4	[M-H]-	Phthalic acid	Organic acids	Organic acids	88-99-3	A	285620	252370	694200	245840	301080	305790	676320	311050	664260	612800	644410	C01606	ko01100,ko02010
pme0281	165.02	121.03	166.027	C8H6O4	[M-H]-	Terephthalic acid	Phenolic acids	Phenolic acids	100-21-0	B	3896400	2568100	5858700	2774600	3090600	3077900	6222900	3551400	5714900	5897900	5384600	C06337	ko01100
pmc0274	167.1	121.1	166.031	C6H6N4S	[M+H]+	6-Methylmercaptopurine	Nucleotides and derivatives	Nucleotides and derivatives	50-66-8	A	11219000	8957200	30642000	33382000	31766000	39947000	22283000	36869000	27080000	26893000	27429000	C16614	--
mws0344	165.04	75	166.048	C5H10O6	[M-H]-	D-Xylonic acid	Organic acids	Organic acids	526-91-0	A	4639300	2999700	4763600	3765900	3652800	3499400	3327100	3963100	3926700	4155800	3907200	C00502	ko00040,ko01100
mws0467	165.06	119.05	166.063	C9H10O3	[M-H]-	3-(4-Hydroxyphenyl)-propionic acid	Phenolic acids	Phenolic acids	501-97-3	B	33528	31342	86452	42712	57389	52456	77936	78959	58531	53177	58908	C01744	--
Lmrn003000	165.06	103.06	166.063	C9H10O3	[M-H]-	2-Hydroxy-3-phenylpropanoic acid	Organic acids	Organic acids	7326-19-4	B	2623.3	2462.3	26982	12052	12592	17906	20435	19389	13685	10171	10208	C05607	ko00360,ko00960,ko01100
Lmgp002595	167.07	121.03	166.063	C9H10O3	[M+H]+	Acetovanillone	Phenolic acids	Phenolic acids	498-02-2	A	868240	837990	980600	740800	1353100	1015900	1015200	842330	996100	997060	990040	C11380	--
mws0851	143.11	143.11	166.097	C8H15NaO2	[M-Na]-	Sodium Valproate	Others	Others	1069-66-5	B	5374700	3588600	3387500	3720700	3804200	3629800	4060700	4755300	4306500	4305500	4353200	--	--
pmn001681	165.09	149.06	166.099	C10H14O2	[M-H]-	1-(4-Methoxyphenyl)-1-propanol	Phenolic acids	Phenolic acids	5349-60-0	B	51834	52991	51252	54641	51688	52116	52086	57013	59384	67653	55915	--	--
NK10253223	168.06	94.06	167.058	C8H9NO3	[M+H]+	2-Amino-3-methoxybenzoic acid	Phenolic acids	Phenolic acids	3177-80-8	B	67924	199440	31835	115450	25419	34854	36325	18836	35443	29317	34938	C05831	ko00380
Zmjp000624	168.06	150.05	167.058	C8H9NO3	[M+H]+	Pyridoxal	Others	Vitamin	66-72-8	B	107150	206580	44488	139500	27774	33362	52258	22716	41026	52654	56117	C00250	ko00750,ko01100
mws2125	166.98	78.7	167.982	C3H5O6P	[M-H]-	Phosphoenolpyruvate	Organic acids	Organic acids	138-08-9	B	353540	112930	549600	215110	393230	263150	319380	211870	320310	322240	315350	C00074	ko00010,ko00020,ko00400,ko00440,ko00620,ko00710,ko00998,ko01100,ko01110,ko01200,ko01230
Hmbp001276	169.05	65.03	168.042	C8H8O4	[M+H]+	Gallacetophenone	Phenolic acids	Phenolic acids	528-21-2	B	208600	258440	172270	220470	126440	149240	89813	121110	169050	168770	172410	--	--
mws0028	167.03	108.02	168.042	C8H8O4	[M-H]-	Vanillic acid	Phenolic acids	Phenolic acids	121-34-6	B	194400	172250	189090	190760	239210	229060	242790	203690	266390	199190	197230	C06672	--
pme2598	167.03	123.04	168.042	C8H8O4	[M-H]-	3,4-Dihydroxybenzeneacetic acid	Phenolic acids	Phenolic acids	102-32-9	B	120380	93014	109930	52711	173880	176520	171510	209780	130370	156540	125260	C01161	ko00350,ko01100
pme1383	170.08	134.1	169.074	C8H11NO3	[M+H]+	Pyridoxine	Others	Vitamin	65-23-6	B	22081	18387	17982	22713	19368	28841	27896	38929	37957	32775	25741	C00314	ko00750,ko01100
pme0181	170.09	124	169.085	C7H11N3O2	[M+H]+	3-Methyl-L-Histidine	Amino acids and derivatives	Amino acids and derivatives	368-16-1	B	54165	70168	45726	60020	47954	58876	52514	58420	66256	50430	50938	C01152	ko00340,ko01100
pme3186	169	79	169.998	C3H7O6P	[M-H]-	DL-Glyceraldehyde-3-phosphate	Organic acids	Organic acids	591-59-3	B	52348	20203	298640	47238	71307	56487	58076	35754	75800	91163	45020	C00661	--
Lmbn003524	171.1	99.08	172.11	C9H16O3	[M-H]-	9-Oxononanoic acid	Organic acids	Organic acids	2553-17-5	A	69508	59096	77610	59304	88012	67703	92878	87222	81899	84096	83034	C16322	ko00592,ko01110
pme0253	174.11	86	173.105	C8H15NO3	[M+H]+	N-Acetyl-L-leucine	Amino acids and derivatives	Amino acids and derivatives	1188-21-2	B	105070	63941	557430	524660	465360	898630	453360	833490	523690	486320	515220	C02710	--
MA10039492	173.01	71.03	174.016	C6H6O6	[M-H]-	Dehydroascorbic acid	Others	Vitamin	490-83-5	A	82774	77610	122280	133290	68062	194210	177530	191270	197820	206530	209730	C05422	ko00053,ko00480,ko01100
pme3009	175.02	99	174.016	C6H6O6	[M+H]+	Trans-Citridic acid	Organic acids	Organic acids	4023-65-8	B	617530	604940	512070	663470	584670	589710	579740	557470	641120	569170	544600	C02341	ko00660,ko01100
pme2550	173.02	137	174.016	C6H6O6	[M-H]-	Cis-Aconitic acid	Organic acids	Organic acids	585-84-2	B	23923	19239	30733	36006	23516	20943	25785	24028	26495	31306	20361	C00417	ko00020,ko00630,ko00660,ko01100,ko01110,ko01210
mws0154	173.05	93	174.053	C7H10O5	[M-H]-	Shikimic acid	Organic acids	Organic acids	138-59-0	B	56089	58917	89140	73391	51843	74556	65620	59654	79105	67839	60077	C00493	ko00400,ko01100,ko01110,ko01230
mws0242	173.08	111	174.089	C8H14O4	[M-H]-	Suberic Acid	Organic acids	Organic acids	505-48-6	A	447930	661340	231520	211600	470940	421720	394700	421150	369450	384930	362070	C08278	--
Zmyn000155	173.11	131.08	174.1	C7H14N2O3	[M-H]-	N-α-Acetyl-L-ornithine	Amino acids and derivatives	Amino acids and derivatives	6205-08-9	B	179100	101660	639860	482390	754520	975870	213300	1499300	609500	543610	518650	C00437	ko00220,ko01100,ko01110,ko01210,ko01230
mws1401	175.11	84	174.1	C7H14N2O3	[M+H]+	L-Theanine	Amino acids and derivatives	Amino acids and derivatives	3081-61-6	B	405250	30367	391840	160990	768100	281670	542790	319140	293800	274860	302480	C01047	--
mws0260	175.12	116	174.112	C6H14N4O2	[M+H]+	L-Arginine	Amino acids and derivatives	Amino acids and derivatives	74-79-3	A	16338000	13355000	35774000	40289000	40172000	49471000	11084000	69498000	36756000	35339000	33042000	C00062	ko00220,ko00261,ko00330,ko00472,ko00970,ko01100,ko01110,ko01230,ko02010
pmf0173	173.15	173.2	174.162	C10H22O2	[M-H]-	1,2-Decanediol	Others	Saccharides and Alcohols	1119-86-4	B	98301	78931	132800	122250	125990	128170	182060	144640	152180	163420	138880	--	--
pme2559	174.04	88	175.048	C6H9NO5	[M-H]-	N-Acetyl-L-Aspartic Acid	Amino acids and derivatives	Amino acids and derivatives	997-55-7	B	170100	91427	158130	127160	281250	132070	249750	178040	147880	174120	191980	C01042	ko00250,ko01100
pme0008	176.1	113	175.096	C6H13N3O3	[M+H]+	L-Citrulline	Amino acids and derivatives	Amino acids and derivatives	372-75-8	A	20348000	18553000	27338000	24326000	35610000	38524000	19086000	47890000	27529000	27098000	28867000	C00327	ko00220,ko01100,ko01110,ko01230
pmb3101	175.06	115	176.068	C7H12O5	[M-H]-	2-Isopropylmalic Acid	Organic acids	Organic acids	49601-06-1	A	8495500	10033000	7189700	7804100	4044300	5845700	6614800	4279100	6681100	6924200	6750500	C02504	ko00290,ko00620,ko01100,ko01110,ko01210,ko01230
mws0875	179.05	76	178.041	C5H10N2O3S	[M+H]+	L-Cysteinyl-L-glycine	Amino acids and derivatives	Amino acids and derivatives	19246-18-5	B	16076	12941	15092	12467	16541	17016	6921.2	10480	13746	11639	12038	C01419	ko00480,ko01100
mws1195	179.07	147.1	178.063	C10H10O3	[M+H]+	p-Coumaric acid methyl ester	Phenolic acids	Phenolic acids	3943-97-3	B	11925	18018	9018	14130	7693.9	13808	12052	8170.5	12019	11156	10186	--	--
pmb2795	177	145	178.063	C10H10O3	[M-H]-	4-Methoxycinnamic acid	Phenolic acids	Phenolic acids	830-09-1	B	9543.8	13206	4827.2	16302	8639.8	12016	9834	8483.6	12013	12338	13007	--	--
mws0009	179.07	91	178.063	C10H10O3	[M+H]+	Coniferaldehyde	Phenolic acids	Phenolic acids	20649-42-7	B	179460	187960	108170	157030	145270	118230	138480	98644	146550	136330	136010	C02666	ko00940,ko01100,ko01110
pmb0786	180.09	163.06	179.079	C6H13NO5	[M+H]+	D-Glucosamine	Others	Saccharides and Alcohols	3416-24-8	B	33296	43956	33972	37417	50466	48545	52719	38182	33551	50791	44523	C00329	ko00520,ko01100
mws2212	179.03	135.05	180.042	C9H8O4	[M-H]-	Caffeic acid	Phenolic acids	Phenolic acids	331-39-5	B	296890	193330	292250	215750	416740	240280	420010	419170	362110	352290	411940	C01197	ko00940,ko01100,ko01110
pmf0139	179.06	59	180.063	C6H12O6	[M-H]-	D-Galactose	Others	Saccharides and Alcohols	59-23-4	B	1947100	3476400	1152500	1804300	367710	741620	4281400	395220	2706400	2527500	2536600	C00124	ko00052,ko01100
pme0516	179.06	87	180.063	C6H12O6	[M-H]-	Inositol	Others	Saccharides and Alcohols	87-89-8	B	173600	215330	347790	357320	253080	403970	439400	335590	375120	396840	376370	C00137	ko00052,ko00053,ko00562,ko01100,ko01110,ko02010,ko04070
mws1164	179.06	59.01	180.063	C6H12O6	[M-H]-	D-Fructose	Others	Saccharides and Alcohols	7660-25-5	A	2273500	3740900	1525000	2122200	408200	735150	6157700	388340	3155900	3980400	3244800	C05003	--
mws4170	179.06	59.01	180.063	C6H12O6	[M-H]-	D-Glucose	Others	Saccharides and Alcohols	14431-43-7	A	2240600	3746100	1575500	2604400	398950	848270	6411500	402060	3140700	3489400	3239900	C00031	ko00010,ko00030,ko00052,ko00500,ko00520,ko00901,ko01100,ko01110,ko02010,ko04933
pmf0138	179.06	59	180.063	C6H12O6	[M-H]-	D-Mannose	Others	Saccharides and Alcohols	3458-28-4	B	2707500	4373500	1445900	2167800	332110	761210	6439800	353040	3201900	3154000	3219500	C00159	ko00051,ko00052,ko00520,ko01100,ko02010
mws0093	179.07	146	180.079	C10H12O3	[M-H]-	Coniferyl alcohol	Phenolic acids	Phenolic acids	458-35-5	A	1170600	1054500	789130	1670300	937690	1062800	913780	1156500	1085500	1100300	1177200	C00590	ko00940,ko00998,ko01100,ko01110
mws0250	182.08	136.1	181.074	C9H11NO3	[M+H]+	L-Tyrosine	Amino acids and derivatives	Amino acids and derivatives	60-18-4	A	10523000	7632100	14892000	16693000	15062000	15307000	10126000	17965000	13263000	13239000	13859000	C00082	ko00130,ko00261,ko00350,ko00360,ko00400,ko00460,ko00730,ko00940,ko00950,ko00965,ko00966,ko00970,ko00998,ko01100,ko01110,ko01210,ko01230
mws1350	181.05	151	182.058	C9H10O4	[M-H]-	Syringaldehyde; 4-Hydroxy-3,5-Dimethoxybenzaldehyde	Phenolic acids	Phenolic acids	134-96-3	B	116670	202270	92270	185760	129060	125150	234080	143330	128940	135630	128880	--	--
Lmrn001951	181.05	135.04	182.058	C9H10O4	[M-H]-	(S)-2-Hydroxy-3-(4-Hydroxyphenyl)Propanoic Acid	Phenolic acids	Phenolic acids	23508-35-2	B	21989	13469	69099	41083	35718	20818	19277	28463	34172	21467	44681	--	--
Hmtn001288	181.05	135.04	182.058	C9H10O4	[M-H]-	Methyl 2,4-dihydroxyphenylacetate	Phenolic acids	Phenolic acids	67828-42-6	B	39520	17089	82063	52356	38338	36700	14139	24827	45068	43806	39400	--	--
mws1155	181.07	101.02	182.079	C6H14O6	[M-H]-	D-Mannitol	Others	Saccharides and Alcohols	69-65-8	A	34841	50190	58683	85257	59176	61702	59407	68208	63327	62014	67106	C00392	ko00051,ko01100,ko02010
mws0214	181.07	71	182.079	C6H14O6	[M-H]-	D-Sorbitol	Others	Saccharides and Alcohols	50-70-4	A	85614	139900	122510	178570	124140	136550	165610	111070	183010	162320	155510	C00794	ko00051,ko00052,ko01100,ko02010
pme2237	181.07	101	182.079	C6H14O6	[M-H]-	Dulcitol	Others	Saccharides and Alcohols	608-66-2	B	147510	222060	198240	346700	196590	280260	239920	275430	279210	242080	260470	C01697	ko00052,ko01100
pme2596	184.06	148	183.053	C8H9NO4	[M+H]+	4-Pyridoxic acid	Others	Vitamin	82-82-6	B	24708	50532	26749	44869	51203	64504	62541	59835	38939	49688	39285	C00847	ko00750,ko01100
pme2732	187.1	141	186.068	C12H10O2	[M+H]+	1-Naphthylacetic acid	Organic acids	Organic acids	86-87-3	B	3947.6	3350.6	5520.3	6343.7	10156	8868.2	9465	14072	9602.7	9228	8324.7	C13014	--
mws0752	185.15	185.16	186.162	C11H22O2	[M-H]-	Undecylic Acid	Lipids	Free fatty acids	112-37-8	A	1059900	1039800	946050	985180	1142600	1259700	1298100	1597700	1227300	1260800	1270500	C17715	--
pmn001492	187.1	123.1	188.041	C11H8O3	[M-H]-	Ayapin	Lignans and Coumarins	Coumarins	494-56-4	B	560560	650600	520460	549300	747480	729970	828610	885660	764670	761440	742380	C18078	--
pme0137	187.07	125	188.08	C7H12N2O4	[M-H]-	N-Acetyl-L-Glutamine	Amino acids and derivatives	Amino acids and derivatives	2490-97-3	B	159190	107490	246120	183340	211590	174190	334240	168540	193380	213460	242270	--	--
pmn001380	187.1	169.09	188.105	C9H16O4	[M-H]-	Eucommiol	Others	Others	55930-44-4	A	725030	845600	658060	748870	1013100	951260	1109500	1147600	1014000	985560	991590	C17878	--
mws0237	187.1	125	188.105	C9H16O4	[M-H]-	Azelaic acid	Organic acids	Organic acids	123-99-9	A	10021000	11044000	9015800	10022000	13095000	12530000	14412000	15082000	13129000	12927000	13153000	C08261	--
mws5041	189.12	86.1	188.116	C8H16N2O3	[M+H]+	L-Glycyl-L-isoleucine	Amino acids and derivatives	Amino acids and derivatives	19461-38-2	B	445490	383770	732450	633110	653260	574460	633940	680250	672000	634700	615230	--	--
mws0736	189.12	86	188.116	C8H16N2O3	[M+H]+	N-Glycyl-L-leucine	Amino acids and derivatives	Amino acids and derivatives	869-19-2	B	575880	508760	964270	898210	864080	725640	843310	870640	821620	871390	789620	C02155	--
pme0122	189.12	126	188.116	C8H16N2O3	[M+H]+	N6-Acetyl-L-lysine	Amino acids and derivatives	Amino acids and derivatives	692-04-6	A	522430	565550	1100800	1322900	1975100	2092900	1562800	2619300	1297000	1389000	1369500	C02727	ko00310,ko01100
Zmjp000182	189.13	70.07	188.127	C7H16N4O2	[M+H]+	N-Monomethyl-L-arginine	Amino acids and derivatives	Amino acids and derivatives	17035-90-4	B	972930	810020	1853400	2530400	2114000	2941600	921730	3623000	1898900	2167500	1969600	C03884	--
pme3388	189.13	144	188.127	C7H16N4O2	[M+H]+	Homoarginine	Amino acids and derivatives	Amino acids and derivatives	156-86-5	B	214150	185330	354410	408010	372990	529630	171630	542290	400670	404990	321290	C01924	--
pmf0348	187.13	97	188.141	C10H20O3	[M-H]-	2,6-Dimethyl-7-octene-2,3,6-triol	Others	Saccharides and Alcohols	73815-21-1	B	1038800	1157300	927750	1057900	1264800	1312400	1506300	1563000	1385600	1372900	1355500	--	--
pme0075	188.06	128	189.064	C7H11NO5	[M-H]-	N-Acetyl-L-glutamic acid	Amino acids and derivatives	Amino acids and derivatives	1188-37-0	A	1767100	738210	1659000	868650	1348900	1301700	1888100	1205300	1177300	1278800	1391000	C00624	ko00220,ko01100,ko01110,ko01210,ko01230
pme2244	190.09	118.07	189.07	C11H11NO2	[M+H]+	3-Indolepropionic acid	Alkaloids	Plumerane	830-96-6	B	5353.2	6192.3	31808	34123	57451	72392	20573	79448	36487	38208	41643	--	--
mws0193	190.12	127	189.111	C7H15N3O3	[M+H]+	L-Homocitrulline	Amino acids and derivatives	Amino acids and derivatives	1190-49-4	B	80038	73715	120120	148420	187280	166140	156770	236280	141440	169580	145780	C02427	--
pme0278	191.1	128	190.095	C7H14N2O4	[M+H]+	2,6-Diaminooimelic acid	Amino acids and derivatives	Amino acids and derivatives	583-93-7	B	1003700	552940	1479100	793010	1053100	959740	847150	1433400	1167000	1028000	1164700	C00666	ko00300,ko01100,ko01110,ko01230
pmb2561	190.1	84	191.062	C7H13NO3S	[M-H]-	N-Acetyl-L-methionine	Amino acids and derivatives	Amino acids and derivatives	65-82-7	B	53576	41616	75099	51852	55474	49909	49156	35553	59700	48912	50551	C02712	--
Zmyn000453	191.02	111.01	192.027	C6H8O7	[M-H]-	Isocitric Acid	Organic acids	Organic acids	320-77-4	A	3441700	4583000	3998200	9390500	5403800	7230700	3755100	5707900	4952200	5021700	4652000	C00311	ko00020,ko00630,ko01100,ko01110,ko01200,ko01210,ko01230
mws0281	191.02	111.01	192.027	C6H8O7	[M-H]-	Citric Acid	Organic acids	Organic acids	77-92-9	A	9308300	11363000	11387000	27018000	13645000	21261000	9982200	15120000	13814000	13745000	13977000	C00158	ko00020,ko00250,ko00630,ko01100,ko01110,ko01200,ko01210,ko01230
mws0277	191.06	85	192.063	C7H12O6	[M-H]-	Quinic Acid	Organic acids	Organic acids	77-95-2	B	6025800	7965300	7698500	14080000	9206400	13548000	7315200	10834000	8405800	7900100	8747000	C00296	ko00400,ko01100
pme2743	194.08	91	193.074	C10H11NO3	[M+H]+	N-Phenylacetylglycine	Amino acids and derivatives	Amino acids and derivatives	500-98-1	B	9	9	261470	61244	71801	118220	69305	165670	109230	105020	95943	C05598	ko00360
mws1189	193.04	72.8	194.033	C6H10O7	[M-H]-	D-Galacturonic acid	Organic acids	Organic acids	685-73-4	B	107800	69135	75393	81704	97390	77109	72489	96759	90107	123110	97646	C00333	ko00040,ko00053,ko00520,ko01100,ko02010
pme3705	193.04	73	194.043	C6H10O7	[M-H]-	D-Glucoronic acid	Others	Saccharides and Alcohols	6556-12-3	B	131240	67611	102230	87548	97626	81693	77515	80827	117090	126300	105920	C00191	ko00040,ko00053,ko00520,ko00562,ko01100
pme0422	193.06	134	194.058	C10H10O4	[M-H]-	Isoferulic Acid	Phenolic acids	Phenolic acids	537-73-5	B	413490	314160	302840	333980	303020	317620	400200	388660	355690	367100	366050	C10470	--
mws0014	193.05	134.01	194.058	C10H10O4	[M-H]-	Ferulic acid	Phenolic acids	Phenolic acids	537-98-4	B	440100	341400	337270	382030	347310	326020	325910	367160	346880	345190	346260	C01494	ko00940,ko01100,ko01110
pmp001235	195.14	79.1	194.131	C12H18O2	[M+H]+	Cinidilide	Others	Others	-	B	11887	7515.1	4212.1	8845.6	10914	10256	11107	19976	16222	12613	11868	--	--
pme0534	195.05	74.9	196.058	C6H12O7	[M-H]-	Gluconic acid	Others	Saccharides and Alcohols	526-95-4	A	966550	515300	1033500	738470	662550	701600	998130	848000	1026000	920850	895680	C00257	ko00030,ko01100,ko01110,ko01200
pme3827	198.08	152.2	197.069	C9H11NO4	[M+H]+	3,4-Dihydroxy-L-phenylalanine (L-Dopa)	Amino acids and derivatives	Amino acids and derivatives	59-92-7	B	57470	9	181790	43776	280650	80035	38089	121970	88717	79547	95155	C00355	ko00350,ko00950,ko00965,ko01100,ko01110
mws0027	197.05	123	198.053	C9H10O5	[M-H]-	Syringic acid	Phenolic acids	Phenolic acids	530-57-4	B	24422	56100	23050	20007	16605	22989	32462	20006	25281	27271	21544	C10833	--
pmb2497	197	153	198.053	C9H10O5	[M-H]-	4-Hydroxy-3-methoxymandelate	Phenolic acids	Phenolic acids	55-10-7	B	59336	27668	87824	43561	75127	36679	66882	42848	67780	63402	73665	C05584	ko00350,ko01100
pmb2640	199.17	199.17	200.178	C12H24O2	[M-H]-	Dodecanoic acid (Lauric acid)	Lipids	Free fatty acids	143-07-7	A	747270	606210	293200	197940	284680	298080	295940	373880	361210	365250	344520	C02679	ko00061,ko01100,ko01110
pme0266	201.11	139	202.121	C10H18O4	[M-H]-	Sebacate	Organic acids	Organic acids	111-20-6	A	11565	12931	6964.8	8734	16428	18029	10410	13482	12458	12775	12352	C08277	--
mws5037	203.14	86.1	202.132	C9H18N2O3	[M+H]+	L-Alanyl-L-leucine	Amino acids and derivatives	Amino acids and derivatives	3303-34-2	B	115830	140930	104360	90386	65966	66454	19312	63425	87105	69679	92586	--	--
mws0282	203.08	116.05	204.09	C11H12N2O2	[M-H]-	L-Tryptophan	Amino acids and derivatives	Amino acids and derivatives	73-22-3	A	6467700	5030800	27998000	34002000	40908000	56680000	23901000	56755000	33267000	31934000	32685000	C00078	ko00260,ko00380,ko00400,ko00901,ko00966,ko00970,ko00998,ko01100,ko01110,ko01210,ko01230
pme1261	206.14	76	205.131	C9H19NO4	[M+H]+	D-Panthenol	Others	Saccharides and Alcohols	81-13-0	A	61725	142580	4143000	1118300	5753900	4605900	4391400	3332400	3303200	3225700	3178300	C05944	ko00770
Lmbn013410	205.16	189.13	206.167	C14H22O	[M-H]-	2,4-Di-Tert-Butylphenol*	Phenolic acids	Phenolic acids	96-76-4	B	1890600	1867600	1692500	2111200	1600700	1964700	1628000	2090700	2199600	2050200	2170300	--	--
Lmln010063	205.16	189.13	206.167	C14H22O	[M-H]-	2,6-Di-tert-butylphenol	Phenolic acids	Phenolic acids	128-39-2	A	1888700	1736800	1666900	2221200	1689600	1958200	1701500	2164900	2249500	2054100	2126900	--	--
mws1014	209.04	149.1	208.037	C10H8O5	[M+H]+	Fraxetin (7,8-Dihydroxy-6-methoxycoumarin)	Lignans and Coumarins	Coumarins	574-84-5	B	16571	26583	16529	24897	22691	24059	19051	20922	22191	20347	21138	C09265	--
pme3443	207.07	192	208.074	C11H12O4	[M-H]-	Sinapinaldehyde	Phenolic acids	Phenolic acids	4206-58-0	A	728610	1335700	261670	544040	368210	368300	818380	342000	543840	499480	520540	C05610	ko00940,ko01100,ko01110
Zmyn000108	209.03	85.03	210.038	C6H10O8	[M-H]-	D-Saccharic acid	Others	Saccharides and Alcohols	87-73-0	B	658050	486300	1067000	690290	630190	740010	1255200	935610	884310	760310	799260	C00818	ko00053,ko01100
Zmpn000199	209.03	85.03	210.038	C6H10O8	[M-H]-	D-Galactaric acid	Others	Saccharides and Alcohols	526-99-8	B	701110	544960	1061300	831140	714020	864040	1158000	901420	717830	950690	864710	C00879	ko00053,ko01100
Hmcn000192	209.07	59.01	210.073	C7H14O7	[M-H]-	Sedoheptulose	Others	Saccharides and Alcohols	3019-74-7	A	363730	278650	556120	363280	362740	426260	522050	489540	436570	350200	412710	C02076	ko00710,ko01100
mws0853	209.08	179	210.089	C11H14O4	[M-H]-	Sinapyl alcohol	Phenolic acids	Phenolic acids	537-33-7	B	116940	266290	43405	114550	66315	66926	148060	60586	113000	107020	88194	C02325	ko00940,ko01100,ko01110
pme0109	212.09	166	211.084	C10H13NO4	[M+H]+	Methyldopa	Amino acids and derivatives	Amino acids and derivatives	555-30-6	B	41540	57832	36247	110780	32503	76242	27815	67568	68269	43376	65080	C07194	--
pmb0128	213.3	81	212.178	C13H24O2	[M+H]+	δ-Tridecalactone	Lipids	Glycerol ester	7370-92-5	A	32825	23149	62624	64355	60407	37899	71722	49549	49403	46444	46640	--	--
pmb2507	213.1	97	214.024	C5H11O7P	[M-H]-	2-Deoxyribose-1-phosphate	Nucleotides and derivatives	Nucleotides and derivatives	17210-42-3	A	879710	242250	1047500	262100	1309000	176810	1040600	392770	733520	702860	586620	C00672	ko00030,ko00240,ko01100
mws0863	213.02	97	214.024	C5H11O7P	[M-H]-	2-Deoxyribose-5'-phosphate*	Nucleotides and derivatives	Nucleotides and derivatives	102916-66-5	A	87057	57692	222360	40711	216960	27492	137730	55001	111450	109460	148160	C00673	ko00030,ko01100
mws0751	213.19	195	214.193	C13H26O2	[M-H]-	Tridecanoic Acid	Lipids	Free fatty acids	638-53-9	A	9787.4	9180.5	7653.2	6020.1	12894	12247	8486.8	13339	9828.5	10092	10811	C17076	--
pme0170	217.13	158	216.122	C8H16N4O3	[M+H]+	N-Acetyl-L-Arginine	Amino acids and derivatives	Amino acids and derivatives	155-84-0	B	12785	17289	73516	45220	59347	60682	118250	44010	58598	78936	65715	--	--
mws5045	215.17	169.16	216.173	C12H24O3	[M-H]-	12-Hydroxydodecanoic acid	Lipids	Free fatty acids	505-95-3	A	624870	238690	464530	697530	374940	265940	324340	437880	436870	438500	420200	C08317	--
pme2566	217.08	199	218.09	C8H14N2O5	[M-H]-	5-L-Glutamyl-L-amino acid	Amino acids and derivatives	Amino acids and derivatives	5875-41-2	B	26904	226840	39518	155370	25318	266010	9	330770	77618	121890	83287	--	--
mws1337	220.12	202.1	219.111	C9H17NO5	[M+H]+	D-Pantothenic Acid	Others	Vitamin	79-83-4	A	5998500	4739500	4907300	5795100	5547000	5748500	4202400	4932400	4878200	4785100	4889200	C00864	ko00410,ko00770,ko01100,ko01110
pme2755	222	144	221.09	C8H15NO6	[M+H]+	N-Acetyl-D-glucosamine	Others	Saccharides and Alcohols	7512-17-6	B	511690	599960	410730	517010	413490	496590	408590	430040	480280	461090	435000	C00140	ko00520,ko01100,ko02010
mws5042	223.11	120.09	222.1	C11H14N2O3	[M+H]+	L-Glycyl-L-phenylalanine	Amino acids and derivatives	Amino acids and derivatives	721-66-4	B	121420	84972	146100	109970	120590	104650	119360	139030	136560	144800	145200	--	--
Hmcp003852	223.21	207.03	222.198	C15H26O	[M+H]+	Elemol	Terpenoids	Sesquiterpenoids	639-99-6	B	3084500	2952800	2919300	3024100	3018300	3016100	3030500	2838500	3819900	3712400	3367800	--	--
mws0520	224.09	136	223.084	C11H13NO4	[M+H]+	N-Acetyl-L-tyrosine	Amino acids and derivatives	Amino acids and derivatives	537-55-3	B	28290	19501	137500	119420	151060	246250	662520	284900	288170	265500	274640	--	--
mws4085	223.06	193	224.068	C11H12O5	[M-H]-	Sinapic acid	Phenolic acids	Phenolic acids	530-59-6	B	8477.2	9528.7	9824.6	8624.5	30944	13401	15359	34917	14298	14208	14234	C00482	ko00940,ko01100,ko01110
pmb2643	225.19	207	226.193	C14H26O2	[M-H]-	Myristoleic acid	Lipids	Free fatty acids	544-64-9	A	1844.8	1360.1	2829	3335.1	3619.9	3555.7	6468.3	5984.4	3437.3	3827.4	3348.4	C08322	--
pme1194	228.1	112	227.091	C9H13N3O4	[M+H]+	2'-Deoxycytidine	Nucleotides and derivatives	Nucleotides and derivatives	951-77-9	A	26523	42825	21596	25163	42532	62913	49381	40093	51629	48512	58248	C00881	ko00240,ko01100,ko02010
Zmjn003398	227.13	183.14	228.136	C12H20O4	[M-H]-	2-Dodecenedioic acid	Lipids	Free fatty acids	6402-36-4	A	1650300	1672200	2049200	3144000	5636300	5524600	4025800	6216800	4132600	3900100	3916100	C16308	ko00592,ko01110
mws0119	227.2	227.2	228.209	C14H28O2	[M-H]-	Myristic Acid	Lipids	Free fatty acids	544-63-8	A	16029000	15107000	13913000	13945000	17163000	20101000	17208000	21284000	29593000	28574000	30558000	C06424	ko00061,ko01100
Lmhp001461	229.15	70.07	229.154	C11H20N2O3	[M+H]+	L-Prolyl-L-Leucine	Amino acids and derivatives	Amino acids and derivatives	52899-07-7	B	352170	253690	474930	405100	470560	389370	439280	557900	439890	463920	464360	--	--
pma6455	229.01	96.97	230.02	C5H11O8P	[M-H]-	Ribulose-5-phosphate	Others	Saccharides and Alcohols	4300-28-1	B	88121	91680	352540	152850	62734	42772	365160	97134	215440	169780	193530	C00117	ko00030,ko00230,ko00440,ko00710,ko01100,ko01110,ko01200,ko01230
mws0474	229.14	211	230.152	C12H22O4	[M-H]-	Dodecanedioic aicd	Organic acids	Organic acids	693-23-2	A	25050	21367	52557	57529	91612	95768	63333	97990	67344	68010	67705	C02678	--
Lmhp001670	231.16	72.08	231.17	C11H22N2O3	[M+H]+	L-Valyl-L-Leucine	Amino acids and derivatives	Amino acids and derivatives	3989-97-7	A	535940	386230	719570	468460	510130	419730	638030	743560	659960	618110	613450	--	--
pmb0962	235.1	118.3	234.158	C10H22N2O4	[M+H]+	L-Lysine-Butanoic Acid	Amino acids and derivatives	Amino acids and derivatives	80407-71-2	B	8126.8	12833	3458.7	12077	14433	10132	28500	33522	12499	16587	21129	--	--
mws4176	237.12	120.09	236.116	C12H16N2O3	[M+H]+	L-Alanyl-L-Phenylalanine	Amino acids and derivatives	Amino acids and derivatives	3061-90-3	B	58238	33585	61879	48604	46305	35339	49416	52939	47492	55228	59639	--	--
Lmhn003240	237.04	121.03	238.048	C11H10O6	[M-H]-	Benzoylmalic acid	Phenolic acids	Phenolic acids	22138-51-8	A	54018	81068	1489100	87633	56782	76850	779680	71405	1669200	1733400	1641400	--	--
mws0221	241.03	152	240.024	C6H12N2O4S2	[M+H]+	L-Cystine	Amino acids and derivatives	Amino acids and derivatives	56-89-3	B	28659	37832	18201	35999	20057	29858	19059	30231	45040	28604	32525	C00491	ko00270,ko01100,ko02010
mws1383	243.09	145	242.08	C12H10N4O2	[M+H]+	Lumichrome	Alkaloids	Alkaloids	1086-80-2	B	440080	225370	247160	213940	223700	203540	170230	148940	231560	219280	221250	C01727	ko00740
pme0264	243.1	127	242.09	C10H14N2O5	[M+H]+	Thymidine	Nucleotides and derivatives	Nucleotides and derivatives	50-89-5	A	95415	92611	74696	93382	133410	161620	137940	261540	172080	159090	139550	C00214	ko00240,ko01100
mws0359	241.22	241.22	242.225	C15H30O2	[M-H]-	Pentadecanoic Acid	Lipids	Free fatty acids	1002-84-2	A	1171400	1267100	1386900	1303000	1372900	1381700	1259700	1263800	1380000	1365500	1650900	C16537	--
Zmyn005209	241.22	225.02	242.225	C15H30O2	[M-H]-	12-Methyltetradecanoic Acid	Lipids	Free fatty acids	5502-94-3	A	39937	50919	85375	64996	66896	66865	77984	82615	61142	65528	81605	C16665	--
ML10180524	244.09	112.05	243.086	C9H13N3O5	[M+H]+	Cytarabine	Nucleotides and derivatives	Nucleotides and derivatives	147-94-4	A	566870	764650	350340	830880	721990	664660	554900	587840	550200	632850	687710	C02961	--
pme3732	244.09	112	243.086	C9H13N3O5	[M+H]+	Cytidine	Nucleotides and derivatives	Nucleotides and derivatives	65-46-3	A	1210900	1090100	654020	956580	920780	987250	985790	1026400	1009900	877490	978710	C00475	ko00240,ko01100,ko02010
mws0248	243.06	110	244.07	C9H12N2O6	[M-H]-	Uridine	Nucleotides and derivatives	Nucleotides and derivatives	58-96-8	A	240100	404290	256800	277230	451570	410760	1057400	466470	396040	530660	627270	C00299	ko00240,ko01100,ko02010
mws0976	243.06	153	244.07	C9H12N2O6	[M-H]-	β-Pseudouridine	Nucleotides and derivatives	Nucleotides and derivatives	1445-07-4	A	96688	71560	39772	49007	55274	43079	90410	40959	53194	63048	70593	C02067	ko00240,ko01100
Lmhp002031	245.18	86.1	245.186	C12H24N2O3	[M+H]+	L-Leucyl-L-Leucine	Amino acids and derivatives	Amino acids and derivatives	3303-31-9	A	318570	192610	414460	278600	240390	178570	253690	280490	318970	285770	306050	--	--
pmb2591	245.09	203.2	246.1	C13H14N2O3	[M-H]-	N-Acetyl-L-Tryptophan	Amino acids and derivatives	Amino acids and derivatives	1218-34-4	A	244530	205200	187610	248970	200880	184160	121310	162530	187570	198280	195890	--	--
mws0124	247.11	130	246.1	C13H14N2O3	[M+H]+	N-(3-Indolylacetyl)-L-alanine	Amino acids and derivatives	Amino acids and derivatives	57105-39-2	B	6367.6	5397.4	18151	26715	27960	37647	34270	37686	21375	25156	20308	--	--
Lmrj002087	247.13	86.09	246.121	C10H18N2O5	[M+H]+	L-Isoleucyl-L-Aspartate	Amino acids and derivatives	Amino acids and derivatives	-	A	201910	244840	260070	331100	330650	365690	301310	365160	328690	306950	284230	--	--
pme2563	249.06	128	250.062	C8H14N2O5S	[M-H]-	γ-Glu-Cys	Amino acids and derivatives	Amino acids and derivatives	636-58-8	B	18398	18038	29100	13323	23299	31485	13750	13880	17731	14388	13748	C00669	ko00480,ko01100
pme3961	252.11	136	251.102	C10H13N5O3	[M+H]+	2'-Deoxyadenosine	Nucleotides and derivatives	Nucleotides and derivatives	958-09-8	B	638860	761770	490660	405820	397150	541650	677750	621790	693770	690880	699310	C00559	ko00230,ko01100,ko02010
pme2776	253.09	137	252.086	C10H12N4O4	[M+H]+	2'-Deoxyinosine	Nucleotides and derivatives	Nucleotides and derivatives	890-38-0	A	5509.1	6864	6685.6	6095.1	24012	26173	26796	48866	20756	23827	24167	C05512	ko00230,ko01100,ko02010
Lmhn003373	253.04	137.02	254.043	C11H10O7	[M-H]-	p-Hydroxybenzoylmalic acid	Phenolic acids	Phenolic acids	-	B	51113	17186	35863	96785	35857	74808	59613	143900	70944	60281	58507	--	--
Hmbp003234	255.09	163.03	254.079	C12H14O6	[M+H]+	1-O-Caffeoylglycerol	Lipids	Glycerol ester	-	B	15155	15473	13994	8915	24123	21528	15146	18288	18688	25176	19325	--	--
mws0361	253.22	235.19	254.225	C16H30O2	[M-H]-	Palmitoleic Acid	Lipids	Free fatty acids	373-49-9	A	7757.9	6986.2	27673	29571	34347	31538	45085	53649	32820	36806	35828	C08362	ko00061
Lmcn009122	253.22	235.21	254.225	C16H30O2	[M-H]-	(7Z)-Hexadecenoic acid	Lipids	Free fatty acids	2416-19-5	A	1916.6	1874	3767.7	4392.5	4864.2	9332.1	10782	12053	8590.1	8480.4	10427	--	--
pma3101	256.2	124.1	256.082	C11H14NO6+	[M+H]+	Nicotinate D-ribonucleoside	Others	Vitamin	17720-18-2	B	1693000	1463600	1050700	1007100	602850	899860	897150	671640	1159900	1067700	1236200	C05841	ko00760,ko01100
mws1488	255.23	237.22	256.24	C16H32O2	[M-H]-	Palmitic acid	Lipids	Free fatty acids	57-10-3	A	37420	39534	38943	40699	51628	42568	55237	52497	47722	42096	54604	C00249	ko00061,ko00062,ko00071,ko00073,ko01040,ko01100,ko01212
mws0120	258.11	104.11	257.103	C8H20NO6P	[M+H]+	Choline Alfoscerate	Lipids	PC	28319-77-9	A	281240	115240	579610	240150	202060	127410	440440	222530	329880	292090	318780	C00670	ko00564,ko00565
pme1187	257.08	124	258.085	C10H14N2O6	[M-H]-	5-Methyluridine	Nucleotides and derivatives	Nucleotides and derivatives	1463-10-1	A	7345.8	4974.2	13188	11889	11359	13954	13354	13971	13233	14818	14264	--	--
mws1090	259.02	97	260.03	C6H13O9P	[M-H]-	Glucose-1-phosphate	Others	Saccharides and Alcohols	59-56-3	A	9441300	5724400	8328100	3770000	2809000	1955100	6221500	1025700	5816300	5177500	5955300	C00103	ko00010,ko00040,ko00052,ko00500,ko00520,ko00523,ko00561,ko01100,ko01110
mws0866	259.02	97	260.03	C6H13O9P	[M-H]-	D-Glucose 6-phosphate	Others	Saccharides and Alcohols	56-73-5	A	9420800	6723500	8338100	4744100	2871000	1881600	6380400	1360700	5145600	5001400	4665600	C00092	ko00500,ko00562,ko00998,ko01100,ko01110
pme3313	259	97	260.03	C6H13O9P	[M-H]-	D-Fructose 6-phosphate	Others	Saccharides and Alcohols	643-13-0	B	1607100	916900	1964800	753050	328010	427920	2216400	368260	1457300	1373100	1181000	C00085	ko00052,ko00500,ko00710,ko01100,ko01110,ko01200
Lmhp001732	263.13	70.07	263.139	C14H18N2O3	[M+H]+	L-Prolyl-L-Phenylalanine	Amino acids and derivatives	Amino acids and derivatives	13589-02-1	B	45498	30994	68400	51922	61977	57743	68043	52248	68640	60433	50407	--	--
mws0715	263.1	145	264.111	C13H16N2O4	[M-H]-	Phenylacetyl-L-glutamine	Amino acids and derivatives	Amino acids and derivatives	28047-15-6	B	9679.3	15731	40603	11179	17846	46354	124940	41848	35675	39933	30931	C04148	ko00360
Lmtn004049	263.13	204.12	264.136	C15H20O4	[M-H]-	Abscisic acid	Organic acids	Organic acids	21293-29-8	A	81104	206600	12060	9232.6	15060	9470.9	41325	6890.2	46126	41915	41060	C06082	ko00906,ko01100,ko01110,ko04075
Lmhp002001	265.15	72.08	265.155	C14H20N2O3	[M+H]+	L-Valyl-L-Phenylalanine	Amino acids and derivatives	Amino acids and derivatives	3918-92-1	A	159950	91663	180050	133830	121900	104810	184720	199690	159240	154770	177040	--	--
Hmsn000210	133.01	115.01	266.224	C17H30O2	[M-H]-	Methyl 7,10-hexadecadienoate	Lipids	Free fatty acids	-	A	6360800	9730000	3150200	4993600	3308700	3546400	6298200	2810200	4979700	4940600	5086900	--	--
pme1184	268.1	152	267.097	C10H13N5O4	[M+H]+	2'-Deoxyguanosine	Nucleotides and derivatives	Nucleotides and derivatives	961-07-9	A	201030	281670	219100	243780	513880	649880	501570	825300	529670	522860	546070	C00330	ko00230,ko01100,ko02010
pme0230	268.1	136.06	267.097	C10H13N5O4	[M+H]+	Adenosine	Nucleotides and derivatives	Nucleotides and derivatives	58-61-7	A	29199000	42200000	24443000	29582000	23540000	24851000	49965000	38448000	37163000	36087000	36975000	C00212	ko00230,ko01100,ko02010
pme2890	269.06	136	268.055	C8H16N2O4S2	[M+H]+	L-Homocystine	Amino acids and derivatives	Amino acids and derivatives	626-72-2	B	22069	16860	17378	28372	14335	28236	26110	33021	23287	27088	24824	C01817	ko00270
pme1119	269.09	137	268.081	C10H12N4O5	[M+H]+	Inosine	Nucleotides and derivatives	Nucleotides and derivatives	58-63-9	A	181440	297370	354920	363300	220900	301170	592070	451540	419780	367230	395750	C00294	ko00230,ko01100,ko02010
mws1060	267.07	135	268.081	C10H12N4O5	[M-H]-	9-(Arabinosyl)hypoxanthine	Nucleotides and derivatives	Nucleotides and derivatives	7013-16-3	A	790120	1368300	1676500	1264500	1100500	1267100	2088200	1411600	1514700	1808100	1530300	--	--
mws0383	267.23	267.23	268.24	C17H32O2	[M-H]-	10-Heptadecenoic Acid	Lipids	Free fatty acids	29743-97-3	A	1036100	1228700	1889200	1624500	1986600	2079000	2157700	2717400	2360800	2219500	2623800	--	--
Lmhn001650	269.03	137.02	270.038	C11H10O8	[M-H]-	p-Hydroxybenzoyltartaric acid	Phenolic acids	Phenolic acids	-	B	21748	18132	26948	24291	26911	38900	18641	16995	22414	32170	22840	--	--
pmf0526	271.1	147.2	270.089	C16H14O4	[M+H]+	Isoimperatorin	Lignans and Coumarins	Coumarins	482-45-1	A	4467.1	9	1455200	20366000	12347	18671	6060.6	9	1299100	1255200	1234600	C16976	--
mws0362	269.25	269.24	270.256	C17H34O2	[M-H]-	Heptadecanoic acid	Lipids	Free fatty acids	506-12-7	A	28330	30531	38490	46399	37348	52189	34012	70758	53887	59731	64402	--	--
pme0376	271.06	151	272.068	C15H12O5	[M-H]-	Naringenin (5,7,4'-Trihydroxyflavanone)	Flavonoids	Dihydroflavone	480-41-1	B	3979.8	1802.2	2230.9	5801.9	4668.5	4639.2	4240.6	5722.1	5101.8	5123.6	3689	C00509	ko00941,ko00943,ko01100,ko01110
mws0914	271.06	151	272.068	C15H12O5	[M-H]-	Pinobanksin	Flavonoids	Dihydroflavonol	548-82-3	B	4207.7	1477.5	3152.3	6633	5186.8	3317	3305.2	8165.3	4921.9	4688.5	5756.9	C09826	ko00941
pme3472	271.09	107.6	272.09	C12H16O7	[M-H]-	Arbutin	Phenolic acids	Phenolic acids	497-76-7	B	600640	1117200	168380	224570	150280	135000	247530	98233	285030	296450	321190	C06186	ko00010
Lmmn003323	271.23	225.22	272.235	C16H32O3	[M-H]-	2-Hydroxyhexadecanoic acid*	Organic acids	Organic acids	764-67-0	B	6242100	5219000	15022000	8082500	10954000	11031000	11288000	8054400	10180000	10057000	10311000	--	--
mws1355	271.23	225.22	272.235	C16H32O3	[M-H]-	16-Hydroxyhexadecanoic acid	Lipids	Free fatty acids	506-13-8	B	3241.9	1456.9	7581	4710.8	7989.9	5807.5	13068	8582.9	7282.9	6168.1	5734.7	C18218	ko00073,ko01100
pmp001264	274.27	256.27	273.267	C16H35NO2	[M+H]+	Hexadecylsphingosine	Lipids	Sphingolipids	-	A	7769500	4883700	6333400	7282500	7282100	6883500	8667700	6796500	7406400	7443800	7415400	--	--
pmb0034	277.1	114.7	276.096	C10H16N2O7	[M+H]+	L-α-Glutamyl-L-Glutamic Acid	Amino acids and derivatives	Amino acids and derivatives	3929-61-1	B	57616	114060	93006	90921	101960	173100	126530	125530	118390	106970	126230	C01425	--
pmb1574	277.2	93	276.209	C18H28O2	[M+H]+	9,12-Octadecadien-6-Ynoic Acid	Lipids	Free fatty acids	61481-29-6	A	44418	49033	87202	69756	105710	106450	65305	134570	107590	109790	96169	--	--
mws1038	277.12	146	278.13	C11H22N2O4S	[M-H]-	Pantetheine	Others	Others	496-65-1	A	476680	414230	403160	389890	395340	455260	231860	345130	341470	354000	463360	C00831	ko00332,ko00770,ko01110
Lmlp012720	279.16	149.02	278.152	C16H22O4	[M+H]+	Dibutyl phthalate	Phenolic acids	Phenolic acids	84-74-2	A	3181500	3954100	3200500	2512300	4026900	3351300	3852900	2925200	3587100	3411700	3270500	C14214	--
Lmxp011770	279.16	149.02	278.152	C16H22O4	[M+H]+	Diisobutyl phthalate	Phenolic acids	Phenolic acids	84-69-5	A	3160700	4080300	3234800	2551400	4076800	3473800	3983000	3012500	3634100	3367700	3281100	C15205	--
pmp001230	279.16	121	278.152	C16H22O4	[M+H]+	Senkyunolide M	Others	Others	146986-60-9	A	8447100	10702000	8825300	6872400	10704000	9453300	10725000	7965500	9961900	9515200	9033600	--	--
mws5035	279.17	120.08	278.163	C15H22N2O3	[M+H]+	L-Leucyl-L-phenylalanine	Amino acids and derivatives	Amino acids and derivatives	56217-82-4	B	228600	136880	255410	173270	172480	141200	160850	169720	172180	213300	184940	--	--
mws0366	277.22	277.22	278.225	C18H30O2	[M-H]-	γ-Linolenic Acid	Lipids	Free fatty acids	506-26-3	A	20656000	19316000	23868000	22971000	25843000	26185000	23738000	31457000	25514000	25257000	27293000	C06426	ko00591,ko01040,ko01100
Lmbn005923	277.22	59.01	278.225	C18H30O2	[M-H]-	Crepenynic acid	Lipids	Free fatty acids	2277-31-8	A	471090	473180	528890	544700	606300	611000	542590	767840	612900	622870	648530	C07289	ko00591
pmb0889	279.23	95.1	278.225	C18H30O2	[M+H]+	Punicic acid (9Z,11E,13Z-octadecatrienoic acid)	Lipids	Free fatty acids	544-72-9	A	1554800	1667300	1636200	1896000	2159600	2497800	2587300	4274900	3270900	2996000	3028500	C08364	--
mws0367	277.22	277.22	278.225	C18H30O2	[M-H]-	α-Linolenic Acid	Lipids	Free fatty acids	463-40-1	A	17267000	16901000	19526000	19626000	22426000	22314000	20040000	27397000	22738000	22034000	23466000	C06427	ko00592,ko01040,ko01100,ko01110
pmb1650	279.2	149.4	278.225	C18H30O2	[M+H]+	Octadeca-11E,13E,15Z-trienoic acid	Lipids	Free fatty acids	25575-00-2	A	18804000	24110000	19240000	15557000	23300000	20070000	23137000	17633000	21290000	20492000	19200000	--	--
Lmhn003223	279.05	147.04	280.058	C13H12O7	[M-H]-	Cinnamoyltartaric acid	Phenolic acids	Phenolic acids	-	B	85266	46362	32903	73196	47045	55356	22448	41325	55399	37040	48763	--	--
mws0629	281.11	166	280.106	C13H16N2O5	[M+H]+	L-Aspartyl-L-Phenylalanine	Amino acids and derivatives	Amino acids and derivatives	13433-09-5	A	165020	190950	159890	182270	150470	192900	110360	156710	168230	160540	184260	--	--
Lmbn006152	279.23	59.01	280.24	C18H32O2	[M-H]-	(9Z,11E)-Octadecadienoic acid	Lipids	Free fatty acids	2540-56-9	A	30527	30995	33742	35958	39347	44360	45693	52834	44179	39303	51542	C04056	ko00591
mws1491	279.23	279.23	280.24	C18H32O2	[M-H]-	Linoleic acid	Lipids	Free fatty acids	60-33-3	A	39407000	40729000	47981000	50984000	60108000	68857000	69154000	85173000	65891000	65430000	77325000	C01595	ko00591,ko01040,ko01100
YC512118	282.28	247.24	281.272	C18H35NO	[M+H]+	Oleamide (9-Octadecenamide)	Lipids	Free fatty acids	301-02-0	A	411490	454180	84605	84102	92645	154720	99701	74600	192000	163050	152490	C19670	--
mws0396	281.25	281.25	282.256	C18H34O2	[M-H]-	Elaidic Acid	Lipids	Free fatty acids	112-79-8	A	15705000	16410000	16902000	17827000	24666000	25718000	32298000	34195000	27207000	23798000	29394000	C01712	--
mws2623	281.25	281.25	282.256	C18H34O2	[M-H]-	11-Octadecanoic acid(Vaccenic acid)	Lipids	Free fatty acids	506-17-2	A	4578400	5068700	4912100	5238200	7444600	7571300	9692800	11633000	8021900	7067800	8587300	C21944	--
pme1178	284.1	152	283.092	C10H13N5O5	[M+H]+	Guanosine	Nucleotides and derivatives	Nucleotides and derivatives	118-00-3	A	6506000	7482900	6324500	6702200	6229400	6600100	9320500	7904500	8194900	7792900	8291100	C00387	ko00230,ko01100,ko02010
Lmhn002051	283.05	167.04	284.053	C12H12O8	[M-H]-	Vnilloylmalic acid	Phenolic acids	Phenolic acids	-	B	12911	11341	9459	9427	7124.9	8925.3	10694	8716.1	12225	7954.1	4987.1	--	--
mws0668	283.07	151	284.076	C10H12N4O6	[M-H]-	Xanthosine	Nucleotides and derivatives	Nucleotides and derivatives	146-80-5	B	1742300	2342500	2352900	2524800	2521500	4038400	2589700	2824600	2471300	2634900	2686000	C01762	ko00230,ko00232,ko01100,ko01110,ko02010
mws1489	283.26	283.26	284.272	C18H36O2	[M-H]-	Stearic Acid	Lipids	Free fatty acids	57-11-4	A	54939000	89032000	83845000	87542000	102590000	114040000	115250000	90727000	6295700	6088500	4594600	C01530	ko00061,ko01040
Zmyn005026	283.26	283.26	284.272	C18H36O2	[M-H]-	16-Methylheptadecanoic acid	Lipids	Free fatty acids	2724-58-5	A	355840	288750	683600	451750	495550	545920	625170	481440	324270	243060	326110	C20356	--
pma1751	286.09	124	285.085	C12H15NO7	[M+H]+	N-(beta-D-Glucosyl)nicotinate	Others	Vitamin	-	B	1887200	950430	872570	427330	169380	151910	417830	146670	503090	459970	482450	--	--
pmp000021	287.09	203.04	286.084	C16H14O5	[M+H]+	Isooxypeucedanine	Lignans and Coumarins	Coumarins	5058-15-1	B	9	9	161490	3753000	9	9	9	9	199760	194660	195530	--	--
pmn001511	285.1	123	286.105	C13H18O7	[M-H]-	3-Hydroxy-5-Methylphenol-1-O-Glucoside	Phenolic acids	Phenolic acids	-	B	466610	484090	414410	552430	1059800	550320	286710	386860	438070	472410	579550	--	--
mws1521	285.1	121.03	286.105	C13H18O7	[M-H]-	Salicin	Phenolic acids	Phenolic acids	138-52-3	B	182890	171710	139660	187130	351880	203550	117350	159530	184500	197800	188570	C01451	ko00010
pme2289	287.2	119	286.23	C20H30O	[M+H]+	Retinol (Vitamin A1)	Others	Vitamin	68-26-8	B	23710	13440	6843.8	12081	4354.2	6618.9	4593.4	3031.7	7223.1	4315.1	7826.1	C00473	ko01100
pmb3081	289	97	290.004	C6H11PO11	[M-H]-	Glucarate O-Phosphoric acid	Others	Saccharides and Alcohols	-	B	5390800	4654800	11638000	5283500	15089000	7962600	5945400	8375700	6932400	8818900	9398700	--	--
pme3163	289	97	290.04	C7H15O10P	[M-H]-	D-Sedoheptuiose 7-phosphate	Others	Saccharides and Alcohols	2646-35-7	B	2688400	1582600	8143300	1960400	9043000	3682700	2257500	4643800	3084400	4052100	5617800	--	--
pmb2657	289.1	97.1	290.123	C10H18N4O6	[M-H]-	Argininosuccinic acid	Organic acids	Organic acids	2387-71-5	B	100280	102880	111120	105300	60852	42306	138900	54324	96208	89820	107360	C03406	ko00220,ko00250,ko01100,ko01110,ko01230
pmf0314	289.25	157	290.261	C20H34O	[M-H]-	(+)-cis-Abienol	Others	Saccharides and Alcohols	17990-16-8	B	8985.2	8594.8	9870.7	6792.4	10785	5975.9	9154.7	7925	9763.9	6528.1	8478.9	--	--
Zmyn004548	291.2	235.17	292.204	C18H28O3	[M-H]-	12-Oxo-phytodienoic acid	Lipids	Free fatty acids	85551-10-6	A	78902	91281	195460	171710	180770	226980	116600	302580	237750	232420	232280	C01226	ko00592,ko01100,ko01110
Lmbn005443	293.21	235.17	294.219	C18H30O3	[M-H]-	13-KODE; (9Z,11E)-13-Oxooctadeca-9,11-dienoic acid	Lipids	Free fatty acids	54739-30-9	A	64158	84016	97004	85323	123890	112450	97784	157220	128270	130400	135400	C14765	ko00591
pmb2787	293.21	275.1	294.219	C18H30O3	[M-H]-	9-Oxo-10E,12Z-octadecadienoic acid	Lipids	Free fatty acids	54232-59-6	A	91776	114650	132770	120720	184250	156560	142000	235810	197540	190080	191630	C14766	ko00591
pmb2792	293.21	193.1	294.219	C18H30O3	[M-H]-	13-Hydroxy-6,9,11-octadecatrienoic acid	Lipids	Free fatty acids	74784-20-6	A	116120	137230	61332	57659	56087	71447	61895	105040	80049	78857	81899	--	--
Zmpn003368	293.21	195.14	294.219	C18H30O3	[M-H]-	13S-Hydroxy-9Z,11E,15Z-octadecatrienoic acid	Lipids	Free fatty acids	87984-82-5	A	424270	481850	602830	731430	605660	716610	634290	1296800	859010	847610	837200	C16316	ko00592
pmb2786	293.21	235.17	294.219	C18H30O3	[M-H]-	9-Hydroxy-10,12,15-octadecatrienoic acid	Lipids	Free fatty acids	89886-42-0	A	65934	80775	105160	81905	129940	117090	96794	156160	130740	134680	133620	C16326	ko00592
Lmcn009539	293.25	293.25	294.256	C19H34O2	[M-H]-	E,E,Z-1,3,12-Nonadecatriene-5,14-diol	Lipids	Free fatty acids	-	A	14882	20906	26335	29073	42274	34390	28872	65792	40418	32532	45583	--	--
Lmqp000329	296.07	104.11	295.056	C8H14N3O7P	[M+H]+	5-Aminoimidazole ribonucleotide	Nucleotides and derivatives	Nucleotides and derivatives	25635-88-5	A	224190	110220	194750	157290	97710	53188	219200	68149	161940	147260	154550	--	--
Rfmb091	295.23	195.14	296.235	C18H32O3	[M-H]-	9S-Hydroxy-10E,12Z-octadecadienoic acid	Lipids	Free fatty acids	15514-85-9	A	1541900	1771300	1727300	1906500	2118100	2687400	2551300	4083200	3185400	3175000	3219000	C14767	ko00591
pmb2799	295.23	195.2	296.235	C18H32O3	[M-H]-	12,13-Epoxy-9-Octadecenoic Acid	Lipids	Free fatty acids	6799-85-5	A	115200	112750	127530	122910	192020	192370	185470	290770	219460	208320	217720	C14826	ko00591,ko01100
Lmbn005369	295.23	195.14	296.235	C18H32O3	[M-H]-	13(S)-HODE;13(S)-Hydroxyoctadeca-9Z,11E-dienoic acid	Lipids	Free fatty acids	10219-69-9	A	1576000	1689000	1685800	1870600	2116200	2608800	2585000	4042600	3108300	3051100	3043800	C14762	ko00591
pme1474	298.1	136	297.09	C11H15N5O3S	[M+H]+	5'-Deoxy-5'-(methylthio)adenosine	Nucleotides and derivatives	Nucleotides and derivatives	2457-80-9	A	49123000	26153000	41589000	10644000	31002000	15879000	28554000	13771000	27266000	26133000	27144000	C00170	ko00270,ko00908,ko01100
pmb0197	298.1	166.3	297.107	C11H15N5O5	[M+H]+	N7-Methylguanosine	Nucleotides and derivatives	Nucleotides and derivatives	20244-86-4	A	223790	177970	68369	79487	74325	67921	51450	27275	67276	70100	78280	C20674	--
Zmyn004714	297.24	183.14	298.251	C18H34O3	[M-H]-	Ricinoleic acid	Lipids	Free fatty acids	141-22-0	B	77148	55821	60624	82965	330900	304500	203890	495410	242810	228390	235060	C08365	--
pmf0297	297.32	183.1	298.324	C20H42O	[M-H]-	1-Eicosanol	Lipids	Free fatty acids	629-96-9	A	70620	62821	63187	78559	329760	297500	203510	498370	245220	241610	251610	--	--
Zmhn001926	299.08	137.02	300.084	C13H16O8	[M-H]-	1-O-Salicyl-D-glucose*	Phenolic acids	Phenolic acids	60517-74-0	B	2812600	2793400	7603300	3957200	3254500	3320900	6361300	3103000	3919900	3752400	3824800	--	--
Zmhn001358	299.08	137.02	300.084	C13H16O8	[M-H]-	4-O-Glucosyl-4-hydroxybenzoic acid	Phenolic acids	Phenolic acids	-	A	2770300	2695300	7666300	3572700	3256900	3254900	5486400	2924800	3800400	3783000	3904400	--	--
pmb3142	299.1	137.1	300.085	C13H16O8	[M-H]-	Salicylic acid-2-O-glucoside	Phenolic acids	Phenolic acids	10366-91-3	B	4053200	4536900	3210600	3762400	3143200	3192100	1841500	2607900	3129100	3190200	3213900	--	--
Hmtn001302	299.08	137.02	300.085	C13H16O8	[M-H]-	Glucosyloxybenzoic acid	Phenolic acids	Phenolic acids	-	B	2633400	2718900	7754300	3476500	3153500	3306900	5194500	3058800	3883100	3752400	3863900	--	--
Hmyn001360	299.11	59.01	300.135	C18H20O4	[M-H]-	Doitungbiphenyl A	Phenolic acids	Phenolic acids	-	B	108650	171710	210680	264090	139430	178750	179700	192210	216720	223920	183980	--	--
Zmyn005384	299.26	253.26	300.266	C18H36O3	[M-H]-	2R-Hydroxyoctadecanoic Acid	Lipids	Free fatty acids	26633-48-7	A	417640	283930	1199600	299650	1005200	652060	976380	373030	583660	523390	807670	C03042	--
Lmqn008288	299.26	299.26	300.267	C18H36O3	[M-H]-	3-Hydroxyoctadecanoic Acid	Lipids	Free fatty acids	45261-96-9	B	2040200	324040	997380	9	6889800	10776000	11010000	24627000	7627100	7868500	7602500	--	--
pme2954	303.05	137.02	302.043	C15H10O7	[M+H]+	Quercetin	Flavonoids	Flavonols	117-39-5	B	45653	31540	40955	46109	34692	35438	27372	50500	40703	46664	31430	C00389	ko00941,ko00944,ko01100,ko01110
Zmhn000892	301.09	139.05	302.1	C13H18O8	[M-H]-	4-O-Glucosyl-3,4-dihydroxybenzyl alcohol	Phenolic acids	Phenolic acids	-	B	394150	532010	365840	362680	312600	366000	265900	270510	369740	375500	338050	--	--
mws1375	304.15	185.09	303.143	C12H21N3O6	[M+H]+	Nicotianamine	Amino acids and derivatives	Amino acids and derivatives	34441-14-0	B	44213	58787	13873	53093	15930	46282	16764	28464	22957	29469	21661	C05324	--
mws0369	303.23	258.9	304.24	C20H32O2	[M-H]-	Arachidonic Acid	Lipids	Free fatty acids	506-32-1	B	10788	1960.7	8039.1	9306.7	13178	8586.9	9943.5	16785	12819	12677	12849	C00219	ko00590,ko00591,ko01040,ko01100
pmb0496	307.18	177.05	306.169	C15H22N4O3	[M+H]+	N-Feruloylagmatine	Alkaloids	Phenolamine	-	B	301710	9	279260	9	252160	9	170460	9	195320	186430	199310	C18325	ko00330,ko01100
pme1373	306.05	110	307.057	C9H14N3O7P	[M-H]-	2'-Deoxycytidine-5'-monophosphate	Nucleotides and derivatives	Nucleotides and derivatives	1032-65-1	A	14485	11984	22474	5417.8	19211	24006	10942	7126.8	14499	14187	15840	C00239	ko00240,ko01100
pme1086	306.08	143	307.084	C10H17N3O6S	[M-H]-	Glutathione reduced form	Amino acids and derivatives	Amino acids and derivatives	70-18-8	A	1080400	832250	1626500	493790	1386100	1321900	282960	640890	901330	977390	1062200	C00051	ko00270,ko00480,ko01100,ko02010
pmb2855	307	145	308.122	C11H20N2O8	[M-H]-	L-Glutamine-O-glycoside	Amino acids and derivatives	Amino acids and derivatives	-	B	306680	86640	164540	9	9	9	549280	9	184150	214290	186050	--	--
pmn001610	307.26	307.3	308.272	C20H36O2	[M-H]-	Eicosadienoic acid	Lipids	Free fatty acids	5598-38-9	A	270280	323940	361060	475060	577800	561130	663480	828610	609010	550710	630970	C16525	ko01040
pmb2857	308.1	146.1	309.106	C11H19NO9	[M-H]-	L-Glutamic acid-O-glycoside	Amino acids and derivatives	Amino acids and derivatives	-	B	100130	55613	119690	65144	58390	44931	167380	70019	108390	92546	91284	--	--
pmb2791	309.21	209.1	310.1	C18H30O4	[M-H]-	9-Hydroperoxy-10E,12,15Z-octadecatrienoic acid	Lipids	Free fatty acids	111004-08-1	A	257060	283790	583150	546870	553410	504930	492620	982840	685960	648740	631260	C16321	ko00592,ko01110
pmb2789	309	209	310.214	C18H30O4	[M-H]-	13S-Hydroperoxy-6Z,9Z,11E-octadecatrienoic acid	Lipids	Free fatty acids	121107-97-9	A	281940	353350	667270	572360	709780	575170	590170	1101600	712990	718920	802800	--	--
pmn001606	309.28	309.28	310.287	C20H38O2	[M-H]-	Eicosenoic acid	Lipids	Free fatty acids	26764-41-0	A	932080	567050	1461800	765650	1367700	1146700	1505500	1520300	9629.3	6632.3	17500	C16526	ko01040
pme3967	312.13	180	311.123	C12H17N5O5	[M+H]+	2-(Dimethylamino)guanosine	Nucleotides and derivatives	Nucleotides and derivatives	2140-67-2	A	671380	477180	250570	355080	311130	321890	335380	284190	370080	346040	362820	--	--
Lmcp005089	313.11	121.07	312.1	C18H16O5	[M+H]+	6,8-Dihydroxy-2-[2-(4-methoxyphenyl)ethyl]chromone	Others	Others	-	A	11814	11077	13158	12914	21241	20893	20657	33247	19998	18423	29129	--	--
pmp000804	313.14	277.2	312.136	C19H20O4	[M+H]+	Isobavachalcone D	Flavonoids	Chalcones	-	B	27939	27613	33630	53078	79318	58910	81189	120520	71680	64721	66076	--	--
mws0636	313.15	166	312.147	C18H20N2O3	[M+H]+	L-Phenylalanyl-L-phenylalanine	Amino acids and derivatives	Amino acids and derivatives	2577-40-4	B	12682	11269	16759	13032	11505	10276	9174.6	12319	10352	13750	13805	--	--
pmb2804	311.1	171.3	312.23	C18H32O4	[M-H]-	13S-Hydroperoxy-9Z,11E-octadecadienoic acid	Lipids	Free fatty acids	33964-75-9	A	117320	112690	122530	152970	136240	157990	164380	268080	216810	205240	204800	C04717	ko00591,ko01100
Rfmb087	311.22	293.21	312.23	C18H32O4	[M-H]-	9-Hydroxy-13-oxo-10-octadecenoic Acid	Lipids	Free fatty acids	-	A	179810	117000	208460	167370	192350	171110	274250	406820	292210	293310	321010	--	--
Lmbn004685	311.22	223.17	312.23	C18H32O4	[M-H]-	5S,8R-DiHODE; (5S,8R,9Z,12Z)-5,8-Dihydroxyoctadeca-9,12-dienoate	Lipids	Free fatty acids	-	A	45177	49705	65053	65754	105950	184010	187180	460930	228310	245280	231070	C20186	ko00591
pmn001689	311.22	223.17	312.23	C18H32O4	[M-H]-	9-Hydroxy-12-oxo-15(Z)-octadecenoic acid	Lipids	Free fatty acids	-	A	41640	53658	56463	60785	101140	169990	161570	421960	223120	231490	231340	C21924	ko00592,ko01110
mws1174	313.07	253	314.079	C17H14O6	[M-H]-	3-O-Acetylpinobanksin	Flavonoids	Dihydroflavonol	52117-69-8	B	17438	9094.9	7657.7	16310	3950.2	16573	94894	4290.9	13681	18641	14781	C16418	ko00941
pmb2871	315.07	153	316.079	C13H16O9	[M-H]-	1-O-Gentisoyl-D-glucoside	Phenolic acids	Phenolic acids	23445-11-6	A	484900	643840	675610	415610	932310	626490	462760	503600	500450	620250	719800	--	--
pmn001367	315.07	153.02	316.079	C13H16O9	[M-H]-	Protocatechuic acid-4-O-glucoside	Phenolic acids	Phenolic acids	-	A	406010	436270	388470	277040	776440	493180	317750	314450	372710	498060	555520	--	--
Hmtn001120	315.11	153.06	316.116	C14H20O8	[M-H]-	5-(2-Hydroxyethyl)-2-O-glucosylphenol	Phenolic acids	Phenolic acids	-	B	42949	59651	54261	81226	70605	117560	59713	118460	84285	79404	66493	--	--
pmb2221	318.3	60.1	317.293	C18H39NO3	[M+H]+	4-Hydroxysphinganine	Lipids	Sphingolipids	554-62-1	A	895570	900060	312690	325830	354110	333080	396110	260710	421270	420900	366900	C12144	ko00600,ko01100
Hmsp007523	319.22	191.1	318.219	C20H30O3	[M+H]+	Methyl-[8]-Shogaol	Phenolic acids	Phenolic acids	863780-79-4	B	14104	16142	16834	20985	24146	13873	17120	18688	20758	19520	17560	--	--
pmb0751	321.1	147.3	320.09	C16H16O7	[M+H]+	Trans-5-O-(p-Coumaroyl)shikimate	Phenolic acids	Phenolic acids	-	B	59734	66626	30475	34768	17980	18997	74315	23568	46178	46450	39879	C02947	ko00940,ko00941,ko00945,ko01100,ko01110
mws0582	322.11	130	321.099	C11H19N3O6S	[M+H]+	S-(Methyl)glutathione	Amino acids and derivatives	Amino acids and derivatives	2922-56-7	A	149010	105750	177010	113720	209150	231310	71726	82187	79348	110460	121560	C11347	--
pme3174	324.06	112	323.052	C9H14N3O8P	[M+H]+	Cytidine 5'-monophosphate(Cytidylic acid)	Nucleotides and derivatives	Nucleotides and derivatives	63-37-6	A	160940	42808	277740	108890	301290	116790	216520	182440	160990	159350	207860	C00055	ko00240,ko01100
pme2074	322.4	129.7	323.21	C18H29NO4	[M-H]-	(-)-Jasmonoyl-L-Isoleucine	Organic acids	Organic acids	120330-93-0	B	265460	423690	355730	533290	440140	242500	982200	316730	497940	522750	545360	C18699	ko04075
pme3188	323.03	211	324.036	C9H13N2O9P	[M-H]-	Uridine 5'-monophosphate	Nucleotides and derivatives	Nucleotides and derivatives	58-97-9	A	847230	403540	1303000	761970	1269300	726200	1651300	1142600	778240	1016400	1214400	C00105	ko00240,ko01100
Hmqp006023	326.27	309.27	324.266	C20H36O3	[M+H]+	Ethyl 9-Hydroxy-10,12-octadecadienoic acid	Lipids	Free fatty acids	-	B	46746	98112	56963	82656	47694	71564	50882	73348	82790	68884	67422	--	--
mws0983	326.31	62.06	325.298	C20H39NO2	[M+H]+	N-Oleoylethanolamine	Alkaloids	Alkaloids	111-58-0	A	522500	1081600	624510	926010	538810	779480	614640	818310	941000	777780	737320	C20792	--
Zmhn002301	325.09	163.04	326.1	C15H18O8	[M-H]-	p-Coumaric acid-4-O-glucoside*	Phenolic acids	Phenolic acids	117405-48-8	A	359060	908500	680410	1356700	748530	1272100	665680	1761400	1018700	1115500	1117700	C06739	--
pmn001419	325.09	163.04	326.1	C15H18O8	[M-H]-	1-O-[(E)-p-Cumaroyl]-D-glucose	Phenolic acids	Phenolic acids	-	A	1020700	1912000	1490000	2701100	1663700	3009800	1410400	4219700	2304600	2267500	2254800	--	--
pmn001691	327.22	291.2	328.225	C18H32O5	[M-H]-	9,12,13-Trihydroxy-10,15-octadecadienoic acid	Lipids	Free fatty acids	-	A	312550	248480	477760	610280	708980	674900	658150	1349600	826190	797240	845990	--	--
mws0884	328.05	134.2	329.053	C10H12N5O6P	[M-H]-	Cyclic 3',5'-Adenylic acid	Nucleotides and derivatives	Nucleotides and derivatives	60-92-4	A	2105800	1298300	5189800	3662600	4028200	3158300	3252300	3365500	2904500	3227100	3483100	C00575	ko00230,ko01100
Lmtn002565	329.11	167.03	330.095	C14H18O9	[M-H]-	1-O-Vanilloyl-D-Glucose*	Phenolic acids	Phenolic acids	-	B	7499.1	5668.9	9	9	534.87	9	54253	142680	24560	28107	28772	C20470	--
Zmhn001883	329.09	209.04	330.095	C14H18O9	[M-H]-	Vanillic acid-4-O-glucoside	Phenolic acids	Phenolic acids	32142-31-7	B	115220	98270	80927	30298	39724	13858	75959	14381	44249	54429	47650	--	--
pmn001517	329.12	167	330.131	C15H22O8	[M-H]-	3,4,5-Trimethoxyphenyl-1-O-Glucoside	Phenolic acids	Phenolic acids	-	B	2538900	3078500	2083700	2779100	1569600	1856200	1338200	1532400	2123000	2169300	2095500	--	--
Hmqn003054	329.23	311.23	330.24	C18H34O5	[M-H]-	9,10,11-Trihydroxy-12-octadecenoic acid	Lipids	Free fatty acids	61911-67-9	A	100670	89654	147490	157620	245660	221330	241060	481750	260540	266640	264750	--	--
Lmbn004240	329.23	199.13	330.241	C18H34O5	[M-H]-	9,10-Dihydroxy-12,13-epoxyoctadecanoic acid	Lipids	Free fatty acids	-	A	18678	16783	38761	43249	67522	62907	70132	112880	63270	94121	70251	C14837	ko00591
pmn001694	329.23	229.15	330.241	C18H34O5	[M-H]-	9,10,13-Trihydroxy-11-Octadecenoic Acid	Lipids	Free fatty acids	29907-57-1	A	1345800	1316500	2012800	2357500	3325900	3291700	3557200	7360400	4028300	3990400	4064900	C14835	ko00591
Lmbn003970	329.23	211.14	330.241	C18H34O5	[M-H]-	9,12,13-TriHOME; 9(S),12(S),13(S)-Trihydroxy-10(E)-octadecenoic acid	Lipids	Free fatty acids	97134-11-7	A	81317	85188	176570	170380	371290	373220	339560	713230	375710	369230	364880	C14833	ko00591
pmp001284	331.28	313.27	330.277	C19H38O4	[M+H]+	Monopalmitin	Lipids	Glycerol ester	542-44-9	A	57980	40739	58705	50158	67154	65842	61593	79704	68272	64043	59191	--	--
pme3184	332.08	136	331.068	C10H14N5O6P	[M+H]+	2'-Deoxyadenosine-5'-monophosphate	Nucleotides and derivatives	Nucleotides and derivatives	653-63-4	A	145640	163510	172370	159690	119850	203790	129720	180220	171100	174220	206840	C00360	ko00230,ko01100
pmb0789	332.13	152.07	331.127	C14H21NO8	[M+H]+	Pyridoxine-5'-O-glucoside	Others	Vitamin	-	B	273000	338950	285290	318040	234160	396870	164360	325330	261660	261610	292340	C03996	--
pmc0066	333.05	137.05	332.052	C10H13N4O7P	[M+H]+	2'-Deoxyinosine-5'-monophosphate	Nucleotides and derivatives	Nucleotides and derivatives	3393-18-8	A	14183	6809.4	9940.8	2220.7	15136	4421.6	16827	6161.6	8854.8	6970.2	5683	C06196	ko00230
Lmfn000604	331.07	169.01	332.074	C13H16O10	[M-H]-	6-O-Galloyl-D-glucose*	Tannins	Tannin	13186-19-1	A	184060	230260	109600	169840	121580	138260	70668	124150	137740	145410	151580	--	--
pmb2928	331	313.1	332.074	C13H16O10	[M-H]-	Gallic acid-4-O-glucoside*	Tannins	Tannin	84274-52-2	B	41644	47555	35150	50117	70550	62663	22429	47320	46597	42763	47515	--	--
pmn001518	331.07	169.01	332.074	C13H16O10	[M-H]-	1-O-Galloyl-D-glucose	Tannins	Tannin	58511-73-2	B	1071800	939390	908410	807850	855270	770860	524390	645700	640980	824080	889040	C01158	--
Zmhn001703	331.07	169.02	332.074	C13H16O10	[M-H]-	5-O-Galloyl-D-hamamelose	Tannins	Tannin	-	B	184840	307380	136280	215040	136590	201270	101680	133720	173430	161730	181140	--	--
Hmln000873	331.07	169.01	332.075	C13H16O10	[M-H]-	2-O-Galloyl-D-glucose*	Tannins	Tannin	-	B	1482100	1053200	1195500	1047200	945720	1059500	777000	847870	1063200	1066400	1079300	--	--
Lmmn001294	331.1	153.02	332.111	C14H20O9	[M-H]-	Koaburaside	Phenolic acids	Phenolic acids	41653-73-0	A	364280	737870	259420	294420	305690	402980	725780	228440	389290	380980	442170	--	--
mws0675	335.06	123	334.057	C11H15N2O8P	[M+H]+	β-Nicotinamide mononucleotide	Nucleotides and derivatives	Nucleotides and derivatives	1094-61-7	A	282940	89659	279420	103360	232370	138450	244000	160650	191750	167870	172240	C00455	ko00760,ko01100
pmf0289	336.17	148	335.159	C15H21N5O4	[M+H]+	Riboprine	Phenolic acids	Phenolic acids	7724-76-7	B	8592.1	11319	3757	6280.5	2316.8	4457	3986.8	3643.4	5804.2	7259.7	7062.7	C16427	ko00908,ko01110
Hmln002806	335.08	179.03	336.085	C16H16O8	[M-H]-	5-O-Caffeoylshikimic acid	Phenolic acids	Phenolic acids	180981-12-8	A	94621	106370	93863	66995	55215	62400	191840	71631	109630	111600	123300	C10434	ko00940,ko00941,ko00945,ko01100,ko01110
pmb0382	339.09	177.2	338.079	C19H14O6	[M+H]+	O-Feruloyl 4-hydroxycoumarin	Lignans and Coumarins	Coumarins	-	B	359560	254880	238220	193740	80059	103650	89480	70532	159400	161980	155280	--	--
pme3311	339	97	339.996	C6H14O12P2	[M-H]-	D-Fructose-1,6-biphosphate	Others	Saccharides and Alcohols	488-69-7	B	53300	26059	77423	33436	43156	25504	55044	33482	47837	39761	55249	C00354	ko00400,ko00710,ko01100,ko01110,ko01200
pma0149	341.08	207.07	340.079	C15H16O9	[M+H]+	Sinapoyl malate	Phenolic acids	Phenolic acids	92344-58-6	B	41864	24542	52837	46660	81273	66297	24048	57658	46813	39836	38902	C02887	ko00940
pmn001420	341.09	179.04	342.095	C15H18O9	[M-H]-	1-O-[(E)-Caffeoyl]-D-glucose	Phenolic acids	Phenolic acids	-	A	4372300	5346500	5322100	5612100	5419100	4598800	2868000	4076200	5461300	4792500	5020800	--	--
Zmhn001793	341.09	179.03	342.096	C15H18O9	[M-H]-	6-O-Caffeoyl-D-glucose*	Phenolic acids	Phenolic acids	-	A	4408300	5073800	4136900	5453800	4953300	4813800	2384500	3883600	4288300	4048900	4209300	--	--
pme0519	341.11	119.03	342.116	C12H22O11	[M-H]-	D-Sucrose	Others	Saccharides and Alcohols	57-50-1	A	332020	1087500	524230	675050	78235	95690	782410	33517	456490	595170	530840	C00089	ko00052,ko00500,ko01100,ko01110,ko02010
MA10039641	341.11	89.02	342.116	C12H22O11	[M-H]-	Lactobiose	Others	Saccharides and Alcohols	63-42-3	A	191710	712950	415920	475290	70499	83563	599410	31120	290250	306070	408870	C00243	ko00052,ko01100,ko02010
Lmsn000381	341.11	89.02	342.116	C12H22O11	[M-H]-	D-Maltose	Others	Saccharides and Alcohols	133-99-3	A	832990	1450600	1027800	1010100	138980	270590	1316100	111410	745170	945780	999330	C01971	--
mws5038	341.11	89.02	342.116	C12H22O11	[M-H]-	Isomaltulose	Others	Saccharides and Alcohols	13718-94-0	A	311910	714240	371890	534720	122160	99878	542180	61538	323250	462070	431030	C01742	--
mws0906	341.12	179	342.131	C16H22O8	[M-H]-	Coniferin	Phenolic acids	Phenolic acids	531-29-3	B	1764100	1186800	575840	629880	330960	368650	799150	411110	725450	797690	714030	C00761	ko00940
pmb2211	343.3	240.7	342.288	C19H38N2O3	[M+H]+	Cocamidopropyl betaine	Alkaloids	Alkaloids	4292-10-8	A	475470	2782900	354420	132000	863680	627320	764570	711220	870290	867750	881770	--	--
Lmmn000774	343.1	181.05	344.111	C15H20O9	[M-H]-	Dihydrocaffeoylglucose	Phenolic acids	Phenolic acids	-	B	331140	335300	428140	279250	392170	276530	1031100	228220	479430	472590	494290	--	--
Hmpn003163	343.16	179.07	344.163	C20H24O5	[M-H]-	5-Hydroxy-1-(4-hydroxy-3-methoxyphenyl)-7-(4-hydroxyphenyl)heptan-3-one	Others	Others	-	B	109790	108940	314140	412110	378950	275500	277030	316780	282490	302380	311800	--	--
mws0609	344.04	150	345.047	C10H12N5O7P	[M-H]-	Guanosine 3',5'-cyclic monophosphate	Nucleotides and derivatives	Nucleotides and derivatives	7665-99-8	A	1981900	928200	6498900	3433700	5409600	3332000	2971200	3271300	3239600	3677000	3660800	C00942	ko00230,ko01100
mws0874	346.06	210.9	347.063	C10H14N5O7P	[M-H]-	3'-Adenylic Acid	Nucleotides and derivatives	Nucleotides and derivatives	84-21-9	A	26833	5371.9	28679	19515	25996	15419	36237	13555	34526	27235	33252	C01367	ko00230,ko01100
pmb0981	348.07	136	347.063	C10H14N5O7P	[M+H]+	Adenosine 5'-monophosphate	Nucleotides and derivatives	Nucleotides and derivatives	61-19-8	A	2999400	1907900	4145200	2666000	4498900	2956900	3790800	3945500	3420500	3583300	3779800	C00020	ko00230,ko00908,ko01100,ko01110
pmb0532	349.05	137.3	348.047	C10H13N4O8P	[M+H]+	Inosine 5'-monophosphate	Nucleotides and derivatives	Nucleotides and derivatives	131-99-7	A	208020	154090	346300	229530	365950	226060	344880	325410	252850	297210	303630	C00130	ko00230,ko01100,ko01110
pmn001381	349.15	187.1	350.158	C15H26O9	[M-H]-	Eucommioside	Terpenoids	Terpene	-	A	2734000	5684800	629740	95054	92138	118770	858370	63599	691040	802470	684080	--	--
pmb1562	351.25	146.9	350.246	C21H34O4	[M+H]+	1-Stearidonoyl-Glycerol	Lipids	Glycerol ester	-	A	122280	137440	239510	224770	277620	290280	178360	368290	253550	250580	268800	--	--
Lmhp011388	353.27	261.22	352.261	C21H36O4	[M+H]+	2-α-Linolenoyl-glycerol*	Lipids	Glycerol ester	55268-58-1	A	5394100	5138100	7982400	7372800	9088400	8143900	5179000	10128000	8416000	7856400	8315500	--	--
Lmhp011562	353.27	261.22	352.261	C21H36O4	[M+H]+	1-α-Linolenoyl-glycerol	Lipids	Glycerol ester	-	A	5889900	6681500	7778400	9496300	10949000	10545000	6552200	13073000	9985100	9074700	9503700	--	--
mws2108	353.09	191.05	354.095	C16H18O9	[M-H]-	Cryptochlorogenic acid (4-O-Caffeoylquinic acid)	Phenolic acids	Phenolic acids	905-99-7	B	336340	448580	165470	427940	200600	209680	490160	311590	348430	253460	148090	--	--
mws1077	355.1	193.05	354.095	C16H18O9	[M+H]+	Scopoletin-7-O-glucoside (Scopolin)	Lignans and Coumarins	Coumarins	531-44-2	B	34091	74430	103480	77049	60989	93673	67922	92291	89783	93188	111400	C01527	ko00940,ko01110
mws0178	353.09	191.01	354.095	C16H18O9	[M-H]-	Chlorogenic acid (3-O-Caffeoylquinic acid)*	Phenolic acids	Phenolic acids	327-97-9	A	540050	598710	251690	428750	325100	217100	643090	373780	409270	302920	189820	C00852	ko00940,ko00941,ko00945,ko01110
Lmhp012042	355.28	263.24	354.277	C21H38O4	[M+H]+	2-Linoleoylglycerol	Lipids	Glycerol ester	3443-82-1	A	478370	397810	612860	571820	803140	673530	537410	1073600	871930	663700	665670	--	--
pmp001283	355.28	337.27	354.277	C21H38O4	[M+H]+	1-Monolinolein	Lipids	Glycerol ester	26545-74-4	A	5541.9	7045.2	4121.3	8411.5	4607.8	10490	7404	13300	10638	12627	11181	--	--
Lmhp112042	355.28	263.24	354.277	C21H38O4	[M+H]+	1-Linoleoylglycerol*	Lipids	Glycerol ester	2277-28-3	A	419200	454910	506350	624160	920950	670270	570080	1091300	804130	671160	705390	--	--
Zmhn002422	355.1	193.05	356.11	C16H20O9	[M-H]-	1-O-Feruloyl-D-Glucose*	Phenolic acids	Phenolic acids	-	A	137020	200070	113410	376660	138900	255960	185500	341820	163390	173870	227420	C17759	--
Hmmn002544	355.1	193.05	356.111	C16H20O9	[M-H]-	Ferulic acid-4-O-glucoside	Phenolic acids	Phenolic acids	117405-51-3	A	2014400	1427200	855960	718530	514930	509030	480250	375940	635340	776470	850230	--	--
pmb0296	357.3	265.4	356.293	C21H40O4	[M+H]+	1-Oleoyl-Sn-Glycerol	Lipids	Glycerol ester	129784-87-8	A	26531	61849	32584	46992	21101	33782	28665	58434	49222	52484	56458	--	--
pmb3107	359.1	182.1	360.106	C15H20O10	[M-H]-	Glucosyringic Acid	Phenolic acids	Phenolic acids	-	B	27624	51488	26157	25763	36230	32341	36038	32397	28798	32063	29887	--	--
pmb0998	364.07	152.1	363.058	C10H14N5O8P	[M+H]+	Guanosine 5'-monophosphate	Nucleotides and derivatives	Nucleotides and derivatives	85-32-5	A	183130	64532	346920	121030	300220	114610	216520	165090	145050	129710	163470	C00144	ko00230,ko01100
mws5040	365.11	203.05	364.078	C12H21O11Na	[M+H]+	Turanose	Others	Saccharides and Alcohols	547-25-1	B	12072000	22540000	10211000	8816800	2406600	2261100	13228000	803910	10998000	11328000	11565000	C19636	--
pmb0964	366.2	204.1	365.17	C16H23N5O5	[M+H]+	Isopentenyladenine-7-N-glucoside	Nucleotides and derivatives	Nucleotides and derivatives	-	A	907530	1616000	840340	724580	230490	236600	1251300	121950	1011600	815550	930300	--	--
mws0011	371.13	209	372.142	C17H24O9	[M-H]-	Syringin	Phenolic acids	Phenolic acids	118-34-3	B	60791	43859	77765	33288	32083	22952	38827	21817	27538	41239	37357	C01533	ko00940
pmb0108	375.2	137.1	374.1	C19H18O8	[M+H]+	Feruloyl syringic acid	Phenolic acids	Phenolic acids	-	B	32684	80346	49216	26525	20292	29197	47760	29891	48632	34347	30460	--	--
mws0232	377.15	243	376.138	C17H20N4O6	[M+H]+	Riboflavin (Vitamin B2)	Others	Vitamin	83-88-5	A	40084000	28358000	29023000	29408000	24920000	22401000	16717000	15845000	23727000	24606000	24936000	C00255	ko00740,ko01100,ko01110,ko02010
pme3337	384.12	252	383.108	C14H17N5O8	[M+H]+	Succinyladenosine	Nucleotides and derivatives	Nucleotides and derivatives	4542-23-8	A	2744100	1325600	2827300	1465000	1680000	1284400	1164000	1512700	1638400	1562900	1728000	--	--
pme1286	385.13	250	384.122	C14H20N6O5S	[M+H]+	S-(5'-Adenosy)-L-homocysteine	Amino acids and derivatives	Amino acids and derivatives	979-92-0	B	213970	222840	172710	135770	127630	150040	168270	116980	177060	166650	186590	C00021	ko00270,ko01100,ko01230
pme2662	385	264	384.339	C27H44O	[M+H]+	Vitamin D3 (Cholecalciferol)	Others	Vitamin	67-97-0	B	4156.7	6905.6	2021.3	7576.3	4510.7	3812.6	1075.5	5193.7	3588	3861.2	3831	C05443	ko00100,ko01100,ko01110
Zmhn002227	385.11	223.06	386.121	C17H22O10	[M-H]-	4-O-Glucosyl-sinapate*	Phenolic acids	Phenolic acids	-	B	164800	151020	229520	130260	260700	204630	181080	209880	165690	164930	178840	C02919	--
HJN003	385.11	223.06	386.122	C17H22O10	[M-H]-	1-O-Sinapoyl-D-glucose	Phenolic acids	Phenolic acids	-	B	173870	117040	238660	158290	242280	194440	188690	231660	174690	186930	207050	C01175	ko00940
Lmmp010562	391.28	149.02	390.277	C24H38O4	[M+H]+	Diisooctyl Phthalate	Phenolic acids	Phenolic acids	27554-26-3	B	12978000	7591500	6918500	17269000	9096400	11516000	8309400	11507000	553840	414930	322640	C14577	--
pme2735	399.2	250	398.137	C15H22N6O5S	[M+H]+	S-Adenosyl-L-methionine	Amino acids and derivatives	Amino acids and derivatives	29908-03-0	B	894320	1211600	548590	745010	303230	538560	407930	233400	698600	710910	668760	C00019	ko00261,ko00270,ko00330,ko00908,ko01100,ko01110,ko01230,ko04122
pmc0281	400.15	136.11	399.139	C15H21N5O8	[M+H]+	Ribosyladenosine	Nucleotides and derivatives	Nucleotides and derivatives	-	A	984360	531210	851610	561580	688150	432270	401700	372160	481530	563750	572390	--	--
mws0043	403.14	373.1	402.131	C21H22O8	[M+H]+	Nobiletin (5,6,7,8,3',4'-Hexamethoxyflavone)	Flavonoids	Flavonoid	478-01-3	B	280390	297410	286240	285050	280990	290460	286770	287100	278910	282470	274920	C10112	--
Cmjn004337	401.14	269.1	402.153	C18H26O10	[M-H]-	Benzyl-(2''-O-xylosyl)glucoside	Phenolic acids	Phenolic acids	-	B	216230	108180	225310	104000	441920	204880	297270	198990	187250	192890	213800	--	--
pme3007	402.99	159	404.002	C9H14N2O12P2	[M-H]-	Uridine 5'-diphosphate	Nucleotides and derivatives	Nucleotides and derivatives	27821-45-0	A	31593	15624	19288	17148	17340	16435	21206	17600	32638	25353	21343	C00015	ko00240,ko00908,ko01100
Zmhn002643	405.12	281.07	406.127	C20H22O9	[M-H]-	4-O-(6'-O-Glucosyl-4''-hydroxybenzoyl)-4-hydroxybenzyl alcohol	Phenolic acids	Phenolic acids	-	A	3115100	6879900	6886900	10465000	8736700	16346000	6968900	15353000	10765000	10615000	10618000	--	--
Hmcn002743	417.15	181.04	418.162	C22H26O8	[M-H]-	Lirioresinol A	Lignans and Coumarins	Lignans	21453-71-4	A	177220	821970	9803.1	18972	13385	11314	328680	6160.5	120870	134030	123190	--	--
pmn001663	417.16	402.1	418.163	C22H26O8	[M-H]-	Syringaresinol	Lignans and Coumarins	Lignans	21453-69-0	A	30378	146280	2010.7	3241.9	9	2168	60099	9	21951	21927	22478	C10889	--
mws2523	421.08	241.1	422.083	C12H23O14P	[M-H]-	Trehalose 6-phosphate	Others	Saccharides and Alcohols	4484-88-2	B	73050	41683	66867	68812	62078	67265	74029	69339	79258	81946	74237	C00689	ko00500,ko01100,ko01110
Lmhp008337	426.26	285.24	425.254	C19H40NO7P	[M+H]+	LysoPE 14:0(2n isomer)*	Lipids	LPE	-	A	99692	77371	98255	97759	152500	119620	179920	140470	141570	121560	135870	--	--
pmb0864	426.26	285.24	425.254	C19H40NO7P	[M+H]+	LysoPE 14:0	Lipids	LPE	-	A	1745800	809140	869400	709570	631650	506610	689950	492380	728430	740640	718880	--	--
pmp000436	427.39	409.38	426.386	C30H50O	[M+H]+	Taraxerol	Terpenoids	Triterpene	127-22-0	B	40562	58066	56976	42628	66248	55186	38751	38324	45006	44226	53397	C08637	ko00909,ko01110
pme2117	426	159	427.029	C10H15N5O10P2	[M-H]-	Adenosine 5'-diphosphate	Nucleotides and derivatives	Nucleotides and derivatives	58-64-0	A	134940	107370	101950	76877	99115	61312	96250	63489	63100	89233	75755	C00008	ko00190,ko00195,ko00230,ko00908,ko01100,ko01110
mws1434	431.1	311	432.106	C21H20O10	[M-H]-	Apigenin-6-C-glucoside (Isovitexin)	Flavonoids	Flavonoid carbonoside	29702-25-8	A	514660	838070	435640	751560	856210	1524200	832870	2023200	864100	838560	783470	C01714	ko00944
mws0072	433.11	271.01	432.106	C21H20O10	[M+H]+	Apigenin-5-O-glucoside	Flavonoids	Flavonoid	28757-27-9	B	27882	32029	20959	31894	27964	61730	22718	81816	39863	32961	30958	--	--
mws0048	431.1	311	432.106	C21H20O10	[M-H]-	Apigenin-8-C-Glucoside (Vitexin)	Flavonoids	Flavonoid carbonoside	3681-93-4	B	499940	816090	450600	743000	882300	1667600	799260	1960300	863180	887000	823510	C01460	ko00941,ko00944
Cmzn005251	433.11	271.06	434.121	C21H22O10	[M-H]-	6-O-Caffeoylarbutin	Phenolic acids	Phenolic acids	136172-60-6	A	24857	37829	29656	40842	38469	83509	23100	76516	63188	56928	55862	--	--
pme1611	433.11	313	434.121	C21H22O10	[M-H]-	Isohemiphloin	Flavonoids	Flavonoid carbonoside	3682-02-8	B	18883	18307	13078	21701	22130	49484	24109	48159	20525	25479	20275	--	--
pma0724	435.13	285.1	434.121	C21H22O10	[M+H]+	Naringenin-6-C-Glucoside	Flavonoids	Flavonoid carbonoside	3682-03-9	B	7864.7	11394	16036	10901	23155	20107	39315	10486	18731	18163	18069	--	--
mws2118	435.13	166.7	436.137	C21H24O10	[M-H]-	Phloretin-2'-O-glucoside (Phlorizin)	Flavonoids	Chalcones	60-81-1	B	24615	15217	5468.2	15968	6582.2	2149.2	20201	7402	13329	11454	4643.1	C01604	ko00941,ko01110
Lmhp008273	438.26	297.24	437.254	C20H40NO7P	[M+H]+	LysoPE 15:1(2n isomer)*	Lipids	LPE	-	A	83749	83122	237400	112920	362820	163660	446360	227430	290230	275100	261400	--	--
Lmhp008440	438.26	297.24	437.254	C20H40NO7P	[M+H]+	LysoPE 15:1	Lipids	LPE	-	A	86988	85993	227460	110230	343820	167260	404120	227440	273940	273840	279540	--	--
Lmhp008885	440.28	299.26	439.27	C20H42NO7P	[M+H]+	LysoPE 15:0(2n isomer)*	Lipids	LPE	-	A	5604900	2769700	4738200	3027400	3418200	2032300	2277200	1765500	3006900	2631700	2347700	--	--
Lmhp009187	440.28	299.26	439.27	C20H42NO7P	[M+H]+	LysoPE 15:0	Lipids	LPE	-	A	9059800	4230400	6415400	4382600	4686100	3070300	3690200	2430000	4193300	4057400	3871800	--	--
pmb0862	440.28	184.07	439.27	C20H42NO7P	[M+H]+	LysoPC 12:0	Lipids	LPC	20559-18-6	A	183060	126590	107260	62987	85509	77210	109260	98299	92922	94655	92065	--	--
pme1014	445.3	341.3	444.303	C31H40O2	[M+H]+	Menatetrenone (Vitamin K2)	Others	Vitamin	11032-49-8	B	2024700	1989700	1939400	1581500	1641500	1693500	1622700	1681900	3112300	2487300	2126600	--	--
Lmhp007836	448.25	307.23	447.239	C21H38NO7P	[M+H]+	LysoPE 16:3	Lipids	LPE	-	B	12081	11036	46474	17456	57449	33337	41344	19584	34085	34956	33314	--	--
mws1608	447.09	357.1	448.101	C21H20O11	[M-H]-	Luteolin-6-C-glucoside (Isoorientin)	Flavonoids	Flavonoid carbonoside	4261-42-1	A	386930	1258400	194830	1166700	321300	1520500	284680	1189200	608750	608490	553710	C01821	--
pme2459	449.11	287.2	448.101	C21H20O11	[M+H]+	Luteolin-7-O-glucoside (Cynaroside)	Flavonoids	Flavonoid	5373-11-5	B	1201000	665520	1245100	315740	163800	224180	301870	161390	502780	494450	514810	C03951	ko00944
mws1299	449.11	299.2	448.101	C21H20O11	[M+H]+	Luteolin-8-C-glucoside (Orientin)*	Flavonoids	Flavonoid carbonoside	28608-75-5	B	351530	1118600	154480	1029100	306600	1403400	276870	1206700	563760	594450	542810	C10114	--
pmf0027	449.11	287.06	449.108	C21H21O11+	[M]+	Cyanidin-3-O-galactoside	Flavonoids	Anthocyanins	142506-26-1	B	31266	37432	16701	15299	12037	15169	6212.7	8100.8	12834	16044	23507	C08647	--
mws1361	449.11	151	450.116	C21H22O11	[M-H]-	Taxifolin-3-O-rhamnoside (Astilbin)	Flavonoids	Dihydroflavonol	29838-67-3	B	23912	58269	16166	38856	24172	38661	12186	47308	37012	31375	27146	C17449	--
Lmhp009034	452.28	311.26	451.27	C21H42NO7P	[M+H]+	LysoPE 16:1	Lipids	LPE	-	A	453840	513990	1826600	1243800	4690400	2750300	7174100	5062600	4070600	3947900	3929700	--	--
Lmhp008763	452.28	311.26	451.27	C21H42NO7P	[M+H]+	LysoPE 16:1(2n isomer)*	Lipids	LPE	-	A	440230	516080	1830500	1231600	4509700	2747800	7040200	4916600	4078700	3916300	3769700	--	--
Li512113	451.09	391.04	452.095	C20H20O12	[M-H]-	Maleoyl-caffeoylquinic acid	Phenolic acids	Phenolic acids	-	B	3443	8446	32211	16708	41502	35368	26283	28669	24531	20287	16243	--	--
pmp001277	454.29	313.28	453.286	C21H44NO7P	[M+H]+	3-{(2-Aminoethoxy)(hydroxy)phosphoryl]oxy}-2-hydroxypropyl palmitate	Alkaloids	Alkaloids	-	A	710370	369330	980100	448060	828190	602110	855370	475420	725720	646000	542950	--	--
pmb0876	454.29	313.27	453.286	C21H44NO7P	[M+H]+	LysoPE 16:0	Lipids	LPE	53862-35-4	A	708330	393300	950190	465760	825710	580700	803310	467130	712970	628150	588300	--	--
pmd0160	454.29	313.27	453.286	C21H44NO7P	[M+H]+	LysoPE 16:0(2n isomer)*	Lipids	LPE	-	A	77385	57070	154540	95916	144550	146910	208100	143420	152800	136270	134640	--	--
Hmbn004734	455.32	455.32	456.325	C29H44O4	[M-H]-	30-Norhederagenin	Steroids	Steroidal saponins	117654-06-5	B	116360	66782	76303	43141	83549	65652	20117	50986	65418	67645	64653	--	--
cub013	457.37	439.36	456.36	C30H48O3	[M+H]+	11-Carbonyl-20β-hydroxycucurbitadienol	Terpenoids	Triterpene	-	B	36887	69362	41994	58438	56914	53224	31091	72297	54949	55531	56428	--	--
mws4053	455.35	455.35	456.36	C30H48O3	[M-H]-	Ursolic acid	Terpenoids	Triterpene	77-52-1	B	2314700	1453100	1290400	1367100	1513200	971570	1311300	1629600	4196.4	3353.2	4399.3	C08988	--
pmb0464	458.1	116.3	457.143	C16H27NO14	[M+H]+	L-Aspartic acid-O-diglucoside	Amino acids and derivatives	Amino acids and derivatives	-	B	90917	135920	327880	201370	92238	103190	594410	52080	303610	295510	345700	--	--
mws2220	457.08	169.02	458.085	C22H18O11	[M-H]-	Gallocatechin 3-O-gallate	Flavonoids	Flavanols	5127-64-0	B	29589	4566.1	9	9	7661.8	9	17279	2297.3	8119.2	5803.7	9281.7	--	--
pmb2654	460.1	117.9	461.153	C19H27NO12	[M-H]-	Anthranilate-1-O-Sophoroside	Phenolic acids	Phenolic acids	-	B	17897	38139	26788	40422	7237.1	10101	32961	3342.4	40752	32846	31998	--	--
Lmhn002321	461.07	167.04	462.08	C21H18O12	[M-H]-	Vnilloylcaffeoyltartaric acid	Phenolic acids	Phenolic acids	-	B	16340	29854	24730	17608	28911	27591	21296	25050	18207	29311	22524	--	--
pmn001702	461.07	285.05	462.08	C21H18O12	[M-H]-	Tetahydroxyflavone-7-O-glucuronide	Flavonoids	Flavonoid	-	B	47634	46064	13395	23056	57469	14153	44117	32713	32555	26797	12776	--	--
Lmnp002845	463.13	343.09	462.116	C22H22O11	[M+H]+	Hispidulin-8-C-glucoside	Flavonoids	Flavonoid carbonoside	-	B	182430	142050	133900	153620	162270	160290	143480	181890	166400	161780	158450	--	--
Lmnn001273	463.05	96.96	463.048	C16H19N2O10S2-	[M]-	4-Hydroxyindol-3-ylmethyl glucosinolate	Others	Glucosinolates	-	B	30754	45394	91576	43598	32568	24452	136720	32390	98857	101810	81169	--	--
mws0061	463.09	300	464.095	C21H20O12	[M-H]-	Quercetin-3-O-galactoside (Hyperin)	Flavonoids	Flavonols	482-36-0	B	54555	40037	37712	28293	34211	24350	120460	27728	50726	44225	37500	C10073	--
mws0091	463.09	300.03	464.095	C21H20O12	[M-H]-	Quercetin-3-O-glucoside (Isoquercitrin)	Flavonoids	Flavonols	482-35-9	B	33006	28341	19822	23903	28016	17505	98971	17430	41653	31563	22797	C05623	ko00944,ko01100,ko01110
pmp001309	465.1	303.1	464.095	C21H20O12	[M+H]+	6-Hydroxykaempferol-7-O-glucoside	Flavonoids	Flavonols	-	B	51983	57584	49950	40619	51061	27703	154730	23786	76140	65721	57639	--	--
pme1598	463.12	301	464.132	C22H24O11	[M-H]-	Hesperetin-5-O-glucoside	Flavonoids	Dihydroflavonol	69651-80-5	B	45935	29572	16575	23501	36566	27317	121290	22720	20517	30279	31522	--	--
Lmhp009769	466.29	325.27	465.286	C22H44NO7P	[M+H]+	LysoPE 17:1	Lipids	LPE	-	A	83670	98368	259470	131570	491440	244420	885500	560860	581760	561030	487150	--	--
Lmhp009464	466.29	325.27	465.286	C22H44NO7P	[M+H]+	LysoPE 17:1(2n isomer)*	Lipids	LPE	-	A	93470	93476	250490	146560	508530	232520	858520	583030	590840	549230	476340	--	--
pmd0130	468.31	184.07	467.301	C22H46NO7P	[M+H]+	LysoPC 14:0	Lipids	LPC	20559-16-4	A	363070	179190	210650	123840	193170	153710	153910	137670	179810	179690	191200	--	--
Lmhp010162	468.31	327.29	467.301	C22H46NO7P	[M+H]+	LysoPE 17:0	Lipids	LPE	-	B	6458	10784	17182	6852.5	12309	13756	25607	11523	21863	20980	24384	--	--
Hmjn008136	469.33	469.33	470.34	C30H46O4	[M-H]-	Camaldulenic acid	Terpenoids	Triterpene	71850-15-2	A	2377200	2995500	1763700	2186300	1201500	1735400	1821100	1089000	2229800	2139700	2306900	--	--
mws4075	469.33	425.4	470.34	C30H46O4	[M-H]-	Hypoglycyrrhizic acid(β)	Terpenoids	Triterpene	471-53-4	A	23345	26415	17993	16983	10792	17736	15105	13281	21306	19692	21592	--	--
pmn001704	469.33	423.33	470.34	C30H46O4	[M-H]-	2,3-Dihydroxy 5(6),12(13)diene ursolic acid	Terpenoids	Triterpene	-	A	1789.5	2189.5	5794.7	2106.4	3133	3165.5	11579	4748.8	6609.8	5422.1	5292.7	--	--
mws1610	471.35	471.35	472.355	C30H48O4	[M-H]-	Maslinic acid	Terpenoids	Triterpene	4373-41-5	A	7611700	9057400	6109400	7987100	3849900	5724700	6702000	3752700	7983000	7578500	7777300	C16939	--
mab0535	473.36	455.35	472.355	C30H48O4	[M+H]+	11-Carbonyl-2β,20β-dihydroxycucurbitadienol	Terpenoids	Triterpene	-	B	32345	23615	23349	22939	28815	19027	16705	26650	32565	31527	28963	--	--
pmn001706	471.35	471.35	472.355	C30H48O4	[M-H]-	2-Hydroxyoleanolic acid	Terpenoids	Triterpene	26707-60-8	A	7221100	8978100	6053800	7633700	3746500	5596100	6549300	3601500	7593800	7439100	7733300	--	--
Lmzn006169	471.35	471.35	472.355	C30H48O4	[M-H]-	Pomolic acid	Terpenoids	Triterpene	13849-91-7	A	7379000	9130100	5793900	7711000	3796700	5655900	6315200	3562600	7604700	7570500	7610200	--	--
pmn001705	471.35	471.35	472.355	C30H48O4	[M-H]-	3,24-Dihydroxy-17,21-semiacetal-12(13)oleanolic fruit	Terpenoids	Triterpene	-	A	7253600	9102000	5844100	7662500	3671500	5532200	6425400	3613300	7546200	7401000	7477900	--	--
pmb1912	474.17	327	473.166	C20H23N7O7	[M+H]+	10-Formyltetrahydrofuran	Alkaloids	Alkaloids	2800-34-2	A	26035000	23298000	22516000	22436000	19371000	19159000	12383000	14001000	19961000	18866000	19384000	C00234	ko00670,ko00970,ko01100,ko01200
Lmhp008801	476.28	335.26	475.27	C23H42NO7P	[M+H]+	LysoPE 18:3	Lipids	LPE	-	A	1045900	867700	1539400	762650	1647100	949770	1708800	687350	1477600	1415500	1373700	--	--
Lmhp008589	476.28	335.26	475.27	C23H42NO7P	[M+H]+	LysoPE 18:3(2n isomer)*	Lipids	LPE	-	A	1121400	882960	1443100	773340	1729600	963730	1726400	660080	1554900	1363900	1350300	--	--
pmp000172	477.14	315.08	476.132	C23H24O11	[M+H]+	5,2'-Dihydroxy-7,8-dimethoxyflavone glycosides	Flavonoids	Flavonoid	-	B	21312	31992	31792	20439	6658.7	15401	10765	7672.5	19150	20767	20386	--	--
pmb0545	477.14	315.09	477.139	C23H25O11+	[M]+	Rosinidin-3-O-glucoside	Flavonoids	Anthocyanins	-	B	14439	25908	15445	17186	27050	11113	87349	14476	21422	32958	31574	--	--
pmb0874	478.29	337.27	477.286	C23H44NO7P	[M+H]+	LysoPE 18:2(2n isomer)*	Lipids	LPE	-	A	570080	381550	731370	436320	985160	620940	934970	492890	809200	804460	726750	--	--
pmb0881	478.29	337.27	477.286	C23H44NO7P	[M+H]+	LysoPE 18:2	Lipids	LPE	-	A	563520	389950	801150	481220	995530	553240	1021800	499170	786020	831770	744480	--	--
pmb0856	480.31	339.29	479.301	C23H46NO7P	[M+H]+	LysoPE 18:1(2n isomer)*	Lipids	LPE	-	A	1643100	1438300	4145400	2137500	5010600	3064600	4823600	3346900	3896900	3741600	3584300	--	--
pmb2260	480.31	184.07	479.301	C23H46NO7P	[M+H]+	LysoPC 15:1	Lipids	LPC	-	B	290380	229700	438210	367460	366760	202810	252830	233920	326350	290060	306410	--	--
mws0289	480.31	339.29	479.301	C23H46NO7P	[M+H]+	LysoPE 18:1	Lipids	LPE	89576-29-4	A	429470	319600	766180	536580	956660	697860	914770	905200	857060	808610	837870	--	--
pmp001280	480.31	339.29	479.301	C23H46NO7P	[M+H]+	3-{[(2-Aminoethoxy)(hydroxy)phosphoryl]oxy}-2-hydroxypropyl-9,12-octadecenoate	Alkaloids	Alkaloids	-	A	431190	299300	747710	539350	958290	756630	945380	922010	795670	841290	844130	--	--
pmb2319	482.32	184.07	481.317	C23H48NO7P	[M+H]+	LysoPC 15:0	Lipids	LPC	108273-89-8	A	831860	612110	785220	582190	737230	507580	427270	485110	571920	570160	578540	--	--
pmb0880	482.32	341.31	481.317	C23H48NO7P	[M+H]+	LysoPE 18:0(2n isomer)*	Lipids	LPE	-	B	8830.3	7288.7	17893	11149	22060	15867	25930	15991	22552	20110	21391	--	--
Lmhp009129	482.32	184.07	481.317	C23H48NO7P	[M+H]+	LysoPC 15:0(2n isomer)*	Lipids	LPC	-	A	1629700	1181500	1501100	994580	1342200	869080	767420	869140	1165200	1067300	1079600	--	--
pmb0883	482.32	341.31	481.317	C23H48NO7P	[M+H]+	LysoPE 18:0	Lipids	LPE	69747-55-3	A	778830	370270	1503300	316490	1242600	893690	1580700	623410	1069800	841810	665360	--	--
pmb3072	481.14	319.3	482.142	C22H26O12	[M-H]-	3-O-p-Coumaroylshikimic acid-O-glucoside	Phenolic acids	Phenolic acids	-	A	83193	111290	81009	92457	72410	84199	64861	78112	84314	84516	100430	--	--
pmp000444	487.34	469.33	486.335	C30H46O5	[M+H]+	27,28-Dicarboxyl ursolic acid	Terpenoids	Triterpene	-	B	346440	477140	283520	291770	176700	334770	233150	163250	280610	236180	265970	--	--
pmn001707	485.33	485.33	486.335	C30H46O5	[M-H]-	Quillaic acid	Phenolic acids	Phenolic acids	631-01-6	B	581460	679360	442120	530350	261320	499900	409630	271790	485880	428200	475570	C08972	--
pmb2987	487.12	163	488.132	C24H24O11	[M-H]-	Acacetin-7-O-(6''-O-acetyl)glucoside	Flavonoids	Flavonoid	-	B	19785	30205	31469	19271	8809.8	24802	18710	17379	24949	23722	29144	--	--
pmn001591	487.34	469.3	488.35	C30H48O5	[M-H]-	Rutundic acid	Terpenoids	Triterpene	20137-37-5	A	2852	3904.6	4578.7	4102.4	3780.6	2376.7	13171	5768.6	4584.4	4767.2	6388.3	--	--
pmn001426	487.34	469.23	488.35	C30H48O5	[M-H]-	Euscaphic acid	Terpenoids	Triterpene	53155-25-2	B	4461.6	2334.8	8208.8	5537.3	7057.3	7653.5	21482	9430.7	7934.4	9453.4	8786.8	C17890	--
pmb0863	492.31	184.07	491.301	C24H46NO7P	[M+H]+	LysoPC 16:2(2n isomer)*	Lipids	LPC	-	A	220350	123910	463700	154940	581810	230340	476120	198730	353030	353030	352500	--	--
pma1303	492.31	184.07	491.301	C24H46NO7P	[M+H]+	LysoPC 16:2	Lipids	LPC	-	A	206320	123660	446390	162730	555170	215170	481160	179950	359310	356880	354190	--	--
pmp001270	494.32	184.07	493.317	C24H48NO7P	[M+H]+	LysoPC 16:1	Lipids	LPC	76790-27-7	A	1076900	732210	2375400	1151300	2442300	1228500	2626000	1270000	1986600	1819500	1846800	--	--
Lmhp008833	494.32	184.07	493.317	C24H48NO7P	[M+H]+	LysoPC 16:1(2n isomer)*	Lipids	LPC	-	A	1134400	773570	2809500	1090100	2481700	1264500	3231200	1554900	1919900	1880000	1808700	--	--
pmd0132	496.34	184.07	495.332	C24H50NO7P	[M+H]+	LysoPC 16:0(2n isomer)*	Lipids	LPC	-	A	3771600	2105700	6168000	5104500	6375600	5390300	6255300	7607600	6686300	6579500	6316200	--	--
pmb0855	496.34	184.07	495.332	C24H50NO7P	[M+H]+	LysoPC 16:0	Lipids	LPC	17364-16-8	A	15516000	9418300	21857000	16653000	17300000	14753000	15942000	17876000	17855000	17002000	16510000	--	--
Lmhp009349	502.29	361.27	501.286	C25H44NO7P	[M+H]+	LysoPE 20:4(2n isomer)*	Lipids	LPE	-	B	9748.8	2585.3	5287.2	4238.6	13466	7131.5	13793	9506.1	10779	10699	10769	--	--
Lmhp009497	502.29	361.27	501.286	C25H44NO7P	[M+H]+	LysoPE 20:4	Lipids	LPE	-	B	10287	3171.4	7644.3	3654.5	11454	6275.8	12935	7646.7	10139	9212.7	8860.5	--	--
Lmhp009802	504.31	363.29	503.301	C25H46NO7P	[M+H]+	LysoPE 20:3(2n isomer)*	Lipids	LPE	-	B	13239	8489.7	17608	10493	16687	10754	14077	10296	14348	14575	15436	--	--
pmn001642	503.08	459.1	504.09	C23H20O13	[M-H]-	Kaempferol-3-O-(2''-O-acetyl)glucuronide	Flavonoids	Flavonols	-	B	53298	9	35391	10939	65924	23799	33883	24498	32081	29089	33807	--	--
mws1589	503.16	179	504.169	C18H32O16	[M-H]-	D-Panose	Others	Saccharides and Alcohols	33401-87-5	B	12818	44618	38281	46744	3067.9	14674	115870	5625.2	54473	69326	56679	C00713	--
pme0500	503.16	323	504.169	C18H32O16	[M-H]-	D-Melezitose	Others	Saccharides and Alcohols	597-12-6	B	27289	16178	33600	20215	8126.1	6800.1	65064	13297	39033	38351	39083	C08243	--
Lmhp010514	506.32	365.31	505.317	C25H48NO7P	[M+H]+	LysoPE 20:2(2n isomer)*	Lipids	LPE	-	B	13314	8555.5	26454	9462.4	33539	17726	24167	13956	24381	24602	19488	--	--
Lmhp010757	506.32	365.31	505.317	C25H48NO7P	[M+H]+	LysoPE 20:2	Lipids	LPE	-	B	52788	21702	55453	41149	46698	31516	45147	31503	43297	41237	43138	--	--
Lmhp008718	506.32	184.07	505.317	C25H48NO7P	[M+H]+	LysoPC 17:2	Lipids	LPC	-	A	441000	289030	868260	269620	1005700	434560	673470	331500	649880	615170	618460	--	--
Hmln002199	505.1	300.03	506.107	C23H22O13	[M-H]-	Quercetin-3-O-(6''-acetyl)galactoside	Flavonoids	Flavonols	-	B	19014	9926.2	2540	7700.1	4698.9	5194.4	8844.8	10163	12463	7561.4	5665.8	--	--
Lmhp009590	508.34	184.07	507.332	C25H50NO7P	[M+H]+	LysoPC 17:1	Lipids	LPC	-	A	523990	361400	986670	385790	916890	464240	790820	537270	737720	708180	637630	--	--
pmb2406	510.36	184.07	509.348	C25H52NO7P	[M+H]+	LysoPC 17:0	Lipids	LPC	50930-23-9	A	132060	114240	331240	172940	234620	276370	281810	324550	292150	270990	280200	--	--
Lmhp010515	510.36	184.07	509.348	C25H52NO7P	[M+H]+	LysoPC 17:0(2n isomer)*	Lipids	LPC	-	A	133400	91038	263010	158860	240300	249070	243210	267710	278400	234960	220220	--	--
pme0065	515.3	479.28	514.293	C30H42O7	[M+H]+	Cucurbitacin I	Terpenoids	Triterpene	2222-07-3	B	29419	53441	33497	59072	60925	39417	40780	72467	43871	62114	46032	C08800	--
Lmhp009526	515.32	261.22	514.314	C27H46O9	[M+H]+	2-α-Linolenoyl-glycerol-1-O-glucoside*	Lipids	Glycerol ester	-	B	18386	14172	16848	13153	7146.9	11675	9393.5	15366	21024	22886	17809	--	--
Lmhp009773	515.32	261.22	514.314	C27H46O9	[M+H]+	1-α-Linolenoyl-glycerol-3-O-glucoside	Lipids	Glycerol ester	-	B	11857	19972	4974.3	14744	4312.7	5620.1	4865.8	6818.4	16584	11315	12887	--	--
Hmqp006235	516.3	184.07	515.297	C26H46NO7P	[M+H]+	LysoPC 18:4	Lipids	LPC	-	A	33631	29707	86845	13528	53880	32682	52590	19729	46504	37537	46168	--	--
Lmbn008694	515.3	497.29	516.309	C30H44O7	[M-H]-	Isocucurbitacin D	Terpenoids	Triterpene	68422-20-8	A	365270	644750	416510	860410	1190000	974780	940060	1324600	1163200	1094600	1063600	--	--
pmp001279	518.32	459.25	517.313	C21H48N3O9P	[M+H]+	Bis(N,N-Diethylethanaminium)-2-acetamido-1,5-anhydro-2-deoxy-1-[-hydroxy(phosphonato)methyl]-D-glucitol	Alkaloids	Alkaloids	-	A	4846600	3111900	5832600	4557100	4739500	4412100	4887900	5193200	6021800	4952700	4565000	--	--
pmb0854	518.32	184.07	517.317	C26H48NO7P	[M+H]+	LysoPC 18:3	Lipids	LPC	-	A	924170	575960	1444700	409840	1345200	619380	1188900	459910	1147300	1059700	1080400	--	--
pmb0865	518.32	184.07	517.317	C26H48NO7P	[M+H]+	LysoPC 18:3(2n isomer)*	Lipids	LPC	-	A	954980	560500	1523800	416110	1386700	608420	1160900	485450	1140100	1108600	1080000	--	--
pmn001433	517.32	499.2	518.324	C30H46O7	[M-H]-	Cucurbitacin F	Terpenoids	Triterpene	5939-57-1	B	5405.8	8600.4	3672.5	15456	21426	17386	10928	19575	16946	24783	17464	C08798	--
pmp001273	520.34	184.07	519.332	C26H50NO7P	[M+H]+	LysoPC 18:2	Lipids	LPC	-	A	659640	372890	982610	337480	930660	472850	927450	406470	775150	664160	712050	--	--
pmp001251	520.34	184.07	519.332	C26H50NO7P	[M+H]+	LysoPC 18:2(2n isomer)*	Lipids	LPC	-	A	669250	360070	986570	332960	832830	485060	895450	417160	780250	784840	738210	--	--
pmn001378	519.19	357.14	520.194	C26H32O11	[M-H]-	Pinoresinol-4-O-glucoside	Lignans and Coumarins	Lignans	41607-20-9	B	84837	63858	28861	17202	23223	12851	28710	28689	30322	40872	32323	C17529	--
Cmsp003083	521.2	131.05	520.194	C26H32O11	[M+H]+	Dehydrodiconiferyl alcohol-4-O-glucoside	Others	Others	107870-88-2	A	399750	488280	494600	379960	365930	367030	599770	328820	552270	531380	505990	--	--
pmp001281	522.36	184.07	521.348	C26H52NO7P	[M+H]+	LysoPC 18:1	Lipids	LPC	-	A	3943200	3202600	4767100	3945000	4091600	3896800	5889200	5397700	5219300	5418400	4638300	--	--
Lmhp010190	522.36	184.07	521.348	C26H52NO7P	[M+H]+	LysoPC 18:1(2n isomer)*	Lipids	LPC	-	A	22942000	13870000	47346000	16955000	36097000	20164000	38818000	20829000	32202000	32109000	30692000	--	--
pmb3041	521.09	329.2	522.101	C23H22O14	[M-H]-	Tricin-7-O-saccharic acid	Flavonoids	Flavonoid	-	B	1227900	870040	767590	463250	458870	363180	649010	296910	681810	632230	612930	--	--
pmn001710	521.13	359.08	522.137	C24H26O13	[M-H]-	Rosmarinic acid-3'-O-glucoside	Phenolic acids	Phenolic acids	910028-78-3	B	123670	83183	100980	73122	50618	57335	85860	37784	85424	78619	95875	--	--
HJN083	521.2	359.15	522.211	C26H34O11	[M-H]-	Lariciresinol-4'-O-glucoside	Lignans and Coumarins	Lignans	143663-00-7	A	120190	102450	123150	79122	62115	65690	99490	55233	100210	83541	110990	--	--
pmd0136	524.37	184.07	523.364	C26H54NO7P	[M+H]+	LysoPC 18:0(2n isomer)*	Lipids	LPC	-	A	439980	235560	1256100	422940	905780	972090	1293400	997810	968540	873940	814440	--	--
mws0126	524.37	184.07	523.364	C26H54NO7P	[M+H]+	LysoPC 18:0	Lipids	LPC	19420-57-6	A	4059500	2047600	8897200	2896900	5813700	5293000	7314100	5349500	5490200	5853300	4581600	--	--
Lmtn003096	523.21	361.14	524.226	C26H36O11	[M-H]-	Secoisolariciresinol 4-O-glucoside	Lignans and Coumarins	Lignans	-	B	9008800	5577500	4936500	3343900	2166800	2184800	2682000	1869600	3945700	3868800	4014600	--	--
Lmhp010041	528.31	387.29	527.301	C27H46NO7P	[M+H]+	LysoPE 22:5	Lipids	LPE	-	B	5161.9	1895.3	8237.2	8166.4	15041	10943	11145	9446.2	11546	10623	8405.7	--	--
Lmhp007598	534.36	184.07	533.348	C27H52NO7P	[M+H]+	LysoPC 19:2(2n isomer)*	Lipids	LPC	-	B	984870	566640	1390400	874220	1880000	832900	1412500	417380	1170400	1152700	931670	--	--
Lmhp007840	534.36	184.07	533.348	C27H52NO7P	[M+H]+	LysoPC 19:2	Lipids	LPC	-	B	967490	546000	1742400	846220	1974900	680740	1415300	504110	963610	957460	1178300	--	--
Lmhp010908	536.37	184.07	535.364	C27H54NO7P	[M+H]+	LysoPC 19:1	Lipids	LPC	-	A	100770	101760	192140	107750	171990	95099	221350	275030	189980	173940	159920	--	--
pmn001375	535.18	373.13	536.189	C26H32O12	[M-H]-	1-Hydroxypinoresinol-1-O-Glucoside	Lignans and Coumarins	Lignans	81495-71-8	B	1117400	1089300	744160	735120	499860	547190	865860	472290	846230	841980	802750	--	--
pmb2228	538.39	184.07	537.379	C27H56NO7P	[M+H]+	LysoPC 19:0	Lipids	LPC	108273-88-7	A	27399	18755	187390	43491	494010	201650	144080	141830	177050	160630	172850	--	--
Lmdn001925	537.2	375.15	538.205	C26H34O12	[M-H]-	Olivil-4'-O-glucoside	Lignans and Coumarins	Lignans	76880-93-8	B	217670	205050	152650	142090	82952	98738	93077	67813	131230	143810	122810	--	--
pmp001274	542.32	483.25	541.317	C28H48NO7P	[M+H]+	2-Hydroxy-5,8,11,14,17-icosapentaenoyloxy]propyl-2-(trimethylammonio)ethyl phosphate	Alkaloids	Alkaloids	-	B	990800	742970	570060	837070	970100	1051900	1266500	1131900	1255700	1281200	1421800	--	--
Lmhp008742	542.32	184.07	541.317	C28H48NO7P	[M+H]+	LysoPC 20:5	Lipids	LPC	162440-04-2	B	12428	9	11784	4149.6	20090	15051	14770	11096	9817.3	13876	10715	--	--
pmc0960	544.34	184.07	543.332	C28H50NO7P	[M+H]+	LysoPC 20:4	Lipids	LPC	-	A	15790	5670.6	39826	12216	54504	22996	62441	48015	51261	46711	38849	--	--
pmp001282	544.34	485.27	543.333	C28H50NO7P	[M+H]+	Propyl 2-(trimethylammonio)ethyl phosphate	Others	Others	-	B	163410	130820	306040	148070	193290	220820	321980	250070	330340	266530	253890	--	--
Lmhp009890	546.36	184.07	545.348	C28H52NO7P	[M+H]+	LysoPC 20:3	Lipids	LPC	1199257-41-4	A	62470	29151	77960	38908	75310	31929	47386	36063	46752	56345	46280	--	--
pmd0147	548.37	184.07	547.364	C28H54NO7P	[M+H]+	LysoPC 20:2	Lipids	LPC	-	A	185640	130150	227030	194120	219230	197300	269270	221180	236770	191750	237990	--	--
pmd0146	548.37	184.07	547.364	C28H54NO7P	[M+H]+	LysoPC 20:2(2n isomer)*	Lipids	LPC	-	A	60748	38109	80294	48295	82936	41704	83154	37892	70170	74923	67214	--	--
Lmhp011549	550.39	184.07	549.379	C28H56NO7P	[M+H]+	LysoPC 20:1	Lipids	LPC	-	A	49511	31277	78776	46791	81218	52040	63826	55494	63278	58080	55724	--	--
pmp000589	551.1	303.05	550.096	C24H22O15	[M+H]+	Quercetin-7-O-(6''-malonyl)glucoside	Flavonoids	Flavonols	-	B	18916	28760	12703	18089	10669	10411	11642	5715.5	15773	17759	17542	--	--
mws0391	555.3	495.5	556.304	C32H44O8	[M-H]-	Cucurbitacin E	Terpenoids	Triterpene	18444-66-1	A	3173400	3148600	2158100	3696500	3397100	2681600	2602800	2952500	3008900	3466200	3406400	C08797	--
pmp001088	559.25	499.2	558.247	C30H38O10	[M+H]+	7α-Acetyldihydronomilin	Others	Others	-	A	42511	42404	33904	52261	44120	42368	40822	47383	39126	45223	46998	--	--
pmp000896	1134.66	576.35	558.286	C32H46O8	[2M+NH4]+	Isocucurbitacin B	Terpenoids	Triterpene	17278-28-3	B	4738.4	8373.5	5672.5	13044	10056	11077	7945.1	9059	12294	14698	8304.2	--	--
cub060	557.31	497.31	558.319	C32H46O8	[M-H]-	23,24-Dihydro cucurbitacin E	Terpenoids	Triterpene	-	B	186170	189970	147990	185080	203870	156270	147970	190200	199950	211250	199030	--	--
Rfmb25702	561.2	357.13	562.205	C28H34O12	[M-H]-	Pinoresinol-4-O-(6''-acetyl)glucoside	Lignans and Coumarins	Lignans	-	B	18232	14132	33531	9985.8	10103	10392	23923	13389	23757	19760	19852	--	--
pmb2922	565.05	323.1	566.055	C15H24N2O17P2	[M-H]-	Uridine 5'-diphospho-D-glucose	Nucleotides and derivatives	Nucleotides and derivatives	133-89-1	A	6364200	5851400	8199700	3444800	2475800	2912000	4658900	1044500	4657000	4637400	4275700	C00029	ko00040,ko00052,ko00053,ko00240,ko00500,ko00520,ko00561,ko00908,ko01100,ko01110
Lmhp009368	568.34	184.07	567.332	C30H50NO7P	[M+H]+	LysoPC 22:6	Lipids	LPC	-	A	55666	17583	64823	142480	169910	113610	55002	52880	101130	96574	90870	--	--
Lmhp010099	570.36	184.07	569.348	C30H52NO7P	[M+H]+	LysoPC 22:5	Lipids	LPC	-	B	13403	6507.5	39651	24453	70545	27603	40145	39721	36735	35286	36902	--	--
Lmhp010394	572.37	184.07	571.364	C30H54NO7P	[M+H]+	LysoPC 22:4	Lipids	LPC	-	B	5237.3	2054.5	4869.8	6045.1	17468	9852	9223.1	7994	8781.6	6274.3	7613.5	--	--
pmn001429	573.31	513.17	574.314	C32H46O9	[M-H]-	Cucurbitacin A	Terpenoids	Triterpene	6040-19-3	A	5344900	7067800	5720900	9488200	9300700	7325600	7177400	9936200	9458600	9283800	9094500	C08793	--
mws1290	593.13	285	594.137	C30H26O13	[M-H]-	Kaempferol-3-O-(6''-p-coumaroyl)glucoside (Tiliroside)	Flavonoids	Flavonols	20316-62-5	B	9	9	9515.9	19432	5783.3	6580.2	81947	4508.3	10699	12720	10136	C17140	--
mws1073	595.17	457.2	594.158	C27H30O15	[M+H]+	Apigenin-6,8-di-C-glucoside (Vicenin-2)	Flavonoids	Flavonoid	23666-13-9	B	9850.7	9360.8	10994	10029	14290	22459	10583	28032	8631.8	12900	13922	C10195	--
pmp001106	595.17	577.16	594.158	C27H30O15	[M+H]+	Vitexin-2''-O-glucoside	Flavonoids	Flavonoid carbonoside	61360-94-9	B	84430	145340	39671	227490	90527	187640	70859	145450	101960	118330	124780	C04024	ko00944
Hmbp001825	597.15	303.05	596.138	C26H28O16	[M+H]+	Quercetin-3-O-sambubioside	Flavonoids	Flavonols	83048-35-5	B	11803	23765	15908	29333	15714	9170.3	11735	4896.3	22042	23299	28627	--	--
pmb3002	607.17	299	608.174	C28H32O15	[M-H]-	Chrysoeriol-7-O-rutinoside	Flavonoids	Flavonoid	-	B	14419	27423	12718	17292	15120	37341	6774.3	49501	24812	29400	26967	--	--
mws1661	609.18	301	608.174	C28H32O15	[M+H]+	Diosmetin-7-O-rutinoside (Diosmin)	Flavonoids	Flavonoid	520-27-4	B	18990	39357	10532	18032	9224.7	6776.2	21312	8500.7	14622	14511	15566	C10039	--
Hmpp002612	611.16	287.05	610.153	C27H30O16	[M+H]+	Luteolin-7-O-gentiobioside	Flavonoids	Flavonoid	-	B	6866.1	18541	7339.2	4610.6	8588.8	14003	5503.6	9560.3	14275	8147.2	7881.7	--	--
pmb0711	611.16	303.1	610.153	C27H30O16	[M+H]+	Quercetin-7-O-rutinoside*	Flavonoids	Flavonols	147714-62-3	B	13763	17663	9406.6	10942	20479	6874.9	13571	4447	23300	20779	20405	--	--
Lmjp002461	611.16	303.05	610.153	C27H30O16	[M+H]+	Quercetin-3-O-neohesperidoside	Flavonoids	Flavonols	117611-67-3	B	13923	19093	8407.9	11704	14989	6741.1	15014	4954.5	22254	17814	17435	--	--
mws0059	609.15	301	610.153	C27H30O16	[M-H]-	Quercetin-3-O-rutinoside (Rutin)	Flavonoids	Flavonols	153-18-4	B	9935.9	9786.3	5262.6	9575.5	5758.8	10792	14920	9917.5	16994	12068	9263.4	C05625	ko00944,ko01100,ko01110
Zmhp002409	611.16	491.12	610.153	C27H30O16	[M+H]+	Isoluteolin-6,8-di-C-glucoside	Flavonoids	Flavonoid	-	B	37503	156040	25498	305290	56310	180350	32912	162220	107390	83761	91320	--	--
HJAP024	611.16	593.15	610.154	C27H30O16	[M+H]+	Kaempferol-6,8-di-C-glucoside	Flavonoids	Flavonoid	-	B	63056	164100	35215	353420	63616	228290	50288	160850	114410	93603	127600	--	--
Lmyn001269	609.15	285.04	610.154	C27H30O16	[M-H]-	Kaempferol-3-O-sophoroside	Flavonoids	Flavonoid	19895-95-5	B	119880	159280	119640	164180	359900	181750	87288	118150	162730	165480	167200	C12634	ko00944
Zmhn002032	609.18	447.13	610.189	C28H34O15	[M-H]-	4-O-(6'-O-Glucosylcaffeoylglucosyl)-4-hydroxybenzyl alcohol	Phenolic acids	Phenolic acids	-	B	137700	399980	69403	812770	173010	534920	108770	401400	319600	275810	269950	--	--
mws4134	611.14	306.08	612.152	C20H32N6O12S2	[M-H]-	Oxiglutatione	Amino acids and derivatives	Amino acids and derivatives	27025-41-8	A	617800	496410	506030	530320	328450	358140	466810	248220	346720	394960	486130	C00127	ko00480,ko01100
Hmqn002332	621.22	561.19	622.225	C30H38O14	[M-H]-	Pharsyringaresinol	Lignans and Coumarins	Lignans	-	B	519380	636600	480430	676050	634610	532350	384860	571920	629090	602910	490220	--	--
Hmjp002999	625.18	317.06	624.162	C28H32O16	[M+H]+	Isorhamnetin-3-O-rutinoside (Narcissin)	Flavonoids	Flavonoid	604-80-8	B	3720.5	5774.5	16953	13527	37124	49580	11404	31772	14759	14334	8963.7	--	--
Lmmp002963	625.18	317.06	624.169	C28H32O16	[M+H]+	6-C-Methylquercetin-3-O-rutinoside	Flavonoids	Flavonols	-	B	9	9	16994	13005	30498	50969	9712.5	32673	15390	14022	15489	--	--
Lmtp003677	627.16	303.04	626.148	C27H30O17	[M+H]+	Quercetin-3-O-sophoroside (Baimaside)	Flavonoids	Flavonols	18609-17-1	B	12359	9145.3	6069.9	15397	14929	13806	18452	6006.7	12593	7524.1	14546	C12667	ko00944
pmf0116	627.16	303.05	627.156	C27H31O17+	[M]+	Delphinidin-3,5-di-O-glucoside	Flavonoids	Anthocyanins	17670-06-3	B	4778.9	10959	5936.1	6626.3	7265	9505.5	6275.8	5716.3	9961.5	8978.1	9312.9	C16312	ko00942
Hmcp001578	641.17	479.11	640.163	C28H32O17	[M+H]+	Isorhamnetin-3,7-O-diglucoside	Flavonoids	Flavonols	6758-51-6	B	24897	24935	16612	23235	15623	13998	9291	9064.9	19147	21685	18001	--	--
pmb2653	649.1	145	650.227	C24H42O20	[M-H]-	D(+)-Melezitose O-rhamnoside	Others	Saccharides and Alcohols	-	B	19696	29169	61493	32582	9	9	200370	9	56912	72880	66974	--	--
pmp000898	663.37	483.3	662.367	C36H54O11	[M+H]+	Deacetoxycucurbitacin B-3-O-glucoside	Terpenoids	Triterpene Saponin	-	B	333740	750510	311400	516780	384150	672710	321400	676980	528570	521220	543280	--	--
pmb0530	664.12	136.2	663.109	C21H27N7O14P2	[M+H]+	Nicotinic acid adenine dinucleotide	Nucleotides and derivatives	Nucleotides and derivatives	53-84-9	A	816310	792290	899350	610480	930860	1010900	892880	723150	909090	860370	919800	C00003	ko00190,ko00730,ko00760,ko01100
pmb2819	665.1	218.1	666.201	C27H38O19	[M-H]-	O-Caffeoyl maltotriose	Phenolic acids	Phenolic acids	-	B	9747.3	12722	6996.3	11327	8743.3	9936.4	7420.2	16411	8632.2	9451.7	11253	--	--
Lmqn000213	665.21	341.11	666.222	C24H42O21	[M-H]-	Stachyose	Others	Saccharides and Alcohols	470-55-3	A	8362.9	16845	37881	35528	2861.5	7525.9	76226	9	34879	45921	41798	C01613	ko00052,ko01100
mws4163	665.21	485.3	666.222	C24H42O21	[M-H]-	Nystose	Others	Saccharides and Alcohols	13133-07-8	A	10297	21320	40726	33704	4964.5	7254.4	71028	9	45490	54700	55440	--	--
pmp001275	672.42	331.29	671.409	C31H61O14N	[M+H]+	3-Hydroxypropyl palmitate glc-glucosamine	Alkaloids	Alkaloids	-	A	578390	876010	415840	846490	304950	521340	367470	376770	592330	562620	731150	--	--
mab0307	675.34	657.33	676.346	C36H52O12	[M-H]-	Cucurbitacin I-2-O-glucoside	Terpenoids	Triterpene Saponin	-	A	353900	536380	298700	406630	596030	586080	352290	506050	412230	427040	473860	--	--
Lmhp008744	677.37	261.22	676.367	C33H56O14	[M+H]+	1-α-Linolenoyl-glycerol-2,3-di-O-glucoside	Lipids	Glycerol ester	-	A	14634	23524	12439	10313	8690.3	11428	11338	19334	19870	18915	18675	--	--
Lmhp008513	677.37	261.22	676.367	C33H56O14	[M+H]+	2-α-Linolenoyl-glycerol-1,3-di-O-glucoside*	Lipids	Glycerol ester	-	A	18350	20224	15865	15343	7165.1	14600	13542	21341	19172	22096	17141	--	--
pmp001276	677.37	677.37	676.367	C33H56O14	[M+H]+	1-Linolenoyl-rac-glycerol-diglucoside	Lipids	Free fatty acids	-	A	968820	1602300	753350	1164400	498130	834510	636740	688700	1153400	1040300	951140	--	--
Lmyn005812	675.36	397.14	676.367	C33H56O14	[M-H]-	Gingerglycolipid A	Lipids	Glycerol ester	145937-22-0	A	811000	1255200	775230	783620	439580	731380	636240	846140	1216300	972970	992380	--	--
mab0310	677.35	659.35	678.362	C36H54O12	[M-H]-	Cucurbitacin D-O-glucoside	Terpenoids	Triterpene Saponin	-	B	68098	138780	41442	120990	68064	118420	42114	124130	84215	90072	98486	--	--
Lmhp009384	679.39	263.24	678.383	C33H58O14	[M+H]+	1-Linoleoylglycerol-2,3-di-O-glucoside	Lipids	Glycerol ester	-	A	5063.3	5054.5	5058.8	5249.7	2927	7966.1	6099.6	7250.2	8451	6898.7	7126.9	--	--
pmp001271	679.39	263.24	678.383	C33H58O14	[M+H]+	1-Linoleoyl-sn-glycerol-diglucoside	Lipids	Free fatty acids	-	A	4588.1	6507.5	4711.4	3919.6	3264.4	6262.4	3431.2	8150.7	8185.3	6900.1	7474.1	--	--
Lmhp009190	679.39	263.24	678.383	C33H58O14	[M+H]+	2-Linoleoylglycerol-1,3-di-O-glucoside*	Lipids	Glycerol ester	-	A	1924.1	7012.8	4179.2	3015.8	5419.9	5751.6	5050.6	8275.4	10350	7114.3	11235	--	--
Lmyn006011	677.38	397.13	678.383	C33H58O14	[M-H]-	Gingerglycolipid B	Lipids	Glycerol ester	88168-90-5	A	84971	181260	138190	127450	86489	184260	102980	225310	211890	203840	190470	--	--
pmb0168	700.49	184.4	699.484	C38H70NO8P	[M+H]+	PC 16:1/14:1	Lipids	PC	-	B	512050	360070	331880	179970	419150	225310	345990	49844	230500	251300	223440	--	--
cub054	701.35	641.34	702.362	C38H54O12	[M-H]-	Cucurbitacin E-O-rhamnoside	Terpenoids	Triterpene Saponin	-	B	48431	68770	29304	36915	42566	42480	22548	29831	40689	37273	37041	--	--
cub052	703.37	643.35	704.377	C38H56O12	[M-H]-	Cucurbitacin B O-rhamnoside	Terpenoids	Triterpene Saponin	-	B	38373	27812	19501	28532	23055	21676	19094	24287	23084	21174	26283	--	--
mab0387	717.35	657.33	718.356	C38H54O13	[M-H]-	Cucurbitacin E-O-glucoside	Terpenoids	Triterpene Saponin	1398-78-3	A	32877000	36948000	28724000	32207000	29519000	28257000	22131000	24504000	31160000	31340000	29464000	--	--
mab0406	719.36	701.35	720.372	C38H56O13	[M-H]-	Cucurbitacin D-O-acetylglucoside	Terpenoids	Triterpene Saponin	-	A	1472200	3300700	1310100	2070300	2184400	2046300	1687500	2304500	2419400	1955300	1860700	--	--
pmp000901	721.38	499.3	720.372	C38H56O13	[M+H]+	Isocucurbitacin B-2-O-glucoside	Terpenoids	Triterpene	-	B	379160	664370	502730	546370	433660	605180	275400	453880	476560	538810	574000	--	--
pme2651	742.1	620.1	743.075	C21H28N7O17P3	[M-H]-	NADP (Nicotinamide adenine dinucleotide phosphate)	Nucleotides and derivatives	Nucleotides and derivatives	53-59-8	A	317050	181210	449920	168660	238090	107440	223380	102510	242720	202890	227210	C00006	ko00195,ko00480,ko00760,ko01100
mab0353	763.35	719.37	764.362	C39H56O15	[M-H]-	Dihydroisocucurbitacin I-malonylglucoside	Terpenoids	Triterpene Saponin	-	B	219410	202020	418390	197950	200990	222580	162170	187140	234650	254070	236670	--	--
